# 1 An open-access volume electron 2 microscopy atlas of whole cells and tissues

3

4 C. Shan Xu<sup>1†</sup>, Song Pang<sup>1\*</sup>, Gleb Shtengel<sup>1\*</sup>, Andreas Müller<sup>2,3,4</sup>, Alex T. Ritter<sup>5</sup>, Huxley K.  
5 Hoffman<sup>6#</sup>, Shin-ya Takemura<sup>1</sup>, Zhiyuan Lu<sup>1</sup>, H. Amalia Pasolli<sup>1§</sup>, Nirmala Iyer<sup>1</sup>, Jeeyun Chung<sup>7,8</sup>,  
6 Davis Bennett<sup>1</sup>, Aubrey V. Weigel<sup>1</sup>, Melanie Freeman<sup>1‡</sup>, Schuyler B. van Engelenburg<sup>6</sup>, Tobias C.  
7 Walther<sup>7,8,9</sup>, Robert V. Farese, Jr.<sup>7,8</sup>, Jennifer Lippincott-Schwartz<sup>1</sup>, Ira Mellman<sup>5</sup>, Michele  
8 Solimena<sup>2,3,4,10</sup>, Harald F. Hess<sup>1†</sup>

9

10 <sup>1</sup>Janelia Research Campus, Howard Hughes Medical Institute, Ashburn, VA 20147, USA

11 <sup>2</sup>Molecular Diabetology, University Hospital and Faculty of Medicine Carl Gustav Carus, TU  
12 Dresden, Dresden, Germany

13 <sup>3</sup>Paul Langerhans Institute Dresden (PLID) of the Helmholtz Center Munich at the University  
14 Hospital Carl Gustav Carus and Faculty of Medicine of the TU Dresden, Dresden, Germany

15 <sup>4</sup>German Center for Diabetes Research (DZD e.V.), Neuherberg, Germany

16 <sup>5</sup>Genentech, Inc., 1 DNA Way, South San Francisco, CA 94080, USA

17 <sup>6</sup>Molecular and Cellular Biophysics Program, Department of Biological Sciences, University of  
18 Denver, Denver, CO 80210, USA

19 <sup>7</sup>Department of Molecular Metabolism, Harvard T.H. Chan School of Public Health, Boston, MA  
20 02115, USA

21 <sup>8</sup>Department of Cell Biology, Harvard Medical School, Boston, MA 02115, USA

22 <sup>9</sup>Howard Hughes Medical Institute, Boston, MA 02492, USA; Broad Institute of Harvard and  
23 MIT, Cambridge, MA 02124, USA

24 <sup>10</sup>Max-Planck Institute of Molecular Cell Biology and Genetics, Dresden, Germany

25 †Correspondence to: [xuc@janelia.hhmi.org](mailto:xuc@janelia.hhmi.org) (C.S.X), [hessh@janelia.hhmi.org](mailto:hessh@janelia.hhmi.org) (H.F.H.)

26 \*These authors contributed equally to this work

27 #Present Address: Department of Cell and Developmental Biology, University of Colorado  
28 Anschutz Medical Campus, Aurora, CO 80045, USA

29 <sup>§</sup>Present Address: Electron Microscopy Resource Center, The Rockefeller University, New York,  
30 NY 10065, USA

31 ‡Present Address: Advanced Bio-imaging Center, Department of Molecular & Cell Biology,  
32 University of California, Berkeley, CA 94720, USA

33 **Understanding cellular architecture is essential for understanding biology. Electron**  
34 **microscopy (EM) uniquely visualizes cellular structures with nanometer resolution. However,**  
35 **traditional methods, such as thin-section EM or EM tomography, have limitations inasmuch**  
36 **as they only visualize a single slice or a relatively small volume of the cell, respectively.**  
37 **Focused Ion Beam-Scanning Electron Microscopy (FIB-SEM) demonstrated the ability to image**  
38 **cellular samples at 4-nm isotropic voxels with rather limited imageable volume. Here, we**  
39 **present 3D EM images of whole cells and tissues with two orders of magnitude increases in**  
40 **imageable volume at 4-nm voxels. Such data with a combined fine resolution scale and large**  
41 **sample size do not currently exist, and are enabled by the advances in higher precision and**  
42 **stability of FIB milling, together with enhanced signal detection and faster SEM scanning.**  
43 **More importantly, we have generated a volume EM atlas encompassing ten diverse datasets**  
44 **of whole cells and tissues, from cancer cells to immune cells, and from mouse pancreatic**  
45 **islets to *Drosophila* neural tissues. These open-access data (via [OpenOrganelle](#)) represent a**  
46 **foundation to nucleate a new field of high-resolution whole-cell volume EM and subsequent**  
47 **analyses, and invite biologists to explore this new paradigm and pose fundamentally new**  
48 **questions.**

49

50 Individual cells and tissues can be described by a 3D hierarchy of ultrastructural details, from  
51 single protein molecules to organelles within complete cellular architecture<sup>1</sup>. Transmission  
52 electron microscopy (TEM) images from ~30–300 nm diamond-knife cut sections of metal  
53 stained samples provide convenient high-resolution visualization on a small fraction of the  
54 whole cell, which have profoundly shaped our understanding of organelles<sup>2</sup>. Series of sections

55 can be digitally stitched together to form a 3D volume, but the 30 nm or larger sampling  
56 interval sacrifices structural detail. Tilt tomography achieves higher 3D resolution on ~200-nm-  
57 thick sections. Alternatively, diamond-knife cut surfaces of a block face sequentially imaged  
58 with scanning electron microscopy (SEM)<sup>3</sup> was a pioneering step to access larger volumes, but  
59 its z resolution is limited to 25 nm due to electron radiation damage from beam scanning that  
60 prevents consistent cutting of thinner slices<sup>4</sup> in subsequent rounds. This z-resolution constraint  
61 can be overcome using FIB-SEM that offers high isotropic resolution. However, its deficiencies  
62 in imaging speed and duration (several days) cap the maximum imageable volume. Our prior  
63 work (Fig. 1a) reported the transformation of a conventional FIB-SEM lacking long-term  
64 reliability into an enhanced platform capable of months to years of continuous imaging at 8-nm  
65 isotropic voxels without defects in the final image stack<sup>5,6,7,8</sup>, but we struggled to obtain  
66 volumes of ~500  $\mu\text{m}^3$  at 4-nm voxels due to slow SEM scan using backscattered electron  
67 detection via a sample biasing scheme<sup>5,9</sup>, and FIB milling instability induced by higher electron  
68 radiation energy density (~400 keV/nm<sup>3</sup>). Thus, higher-resolution isotropic 3D whole cell data  
69 remained mostly out of reach.

70 Here we report imageable volumes greater than 100,000  $\mu\text{m}^3$  at 4-nm voxels. This newly  
71 accessible paradigm is illustrated in Extended Data Fig. 1. The two orders of magnitude  
72 improvement in volumes compared to our prior work<sup>5</sup> primarily come from: 1) higher precision  
73 and stability of FIB milling control to extend reliable long-term acquisition to 4-nm voxels, and  
74 2) enhanced SEM signal detection using secondary electrons with higher beam current to  
75 achieve faster imaging, hence reducing electron radiation energy density (from ~400 to ~80  
76 keV/nm<sup>3</sup>) that further improves FIB milling control. To overcome milling instability, we

77 integrated a more stable FIB column (Capella from Zeiss), and tightened its FIB emission current  
78 control band to obtain a consistent milling beam profile. We also re-configured the closed-loop  
79 control<sup>5</sup> to reduce the milling variation between FIB reheat cycles. Such FIB milling optimization  
80 allowed for faster SEM imaging<sup>5</sup> using secondary electrons with 5x lower electron radiation  
81 energy density, which subsequently further mitigated FIB milling artifacts and instability.  
82 Additionally, we investigated a multi-dimensional operation space to optimize image contrast  
83 and isotropic resolution. We found that a beam current of 200 to 300 pA and a landing energy  
84 of 700 to 900 eV are optimal which further accelerate the imaging rate. Such positive synergy  
85 between faster SEM scanning and robust FIB milling has extended reliable imaging acquisition  
86 at 4-nm isotropic voxels from less than a week to months. The detailed instrumentation  
87 improvements are described in the Methods Section. To validate the choice of sampling voxel  
88 size, we characterized the resolution in x-y and z by analyzing the transitions at the edges of  
89 gold nanoparticles on a carbon substrate and ribosomes in cultured cells. The ribosomes in  
90 biological specimens serve as a convenient *in situ* resolution standard. Fig. 1b shows near-  
91 isotropic resolution matching of the 4-nm voxel size with the average transitions from 37% to  
92 63% being 2.5 nm in x-y and 3.1 nm in z, respectively. The x-y transitions determined from  
93 ribosome edges are about 30% larger than those for the gold nanoparticles (vertical lines in Fig.  
94 1b). The procedure for estimating the resolution with examples is presented in the Methods  
95 Section. Furthermore, an improved sample staining protocol yielding higher contrast leads to  
96 additional 5x–10x scanning rate improvement, thereby 200x larger volume is demonstrated on  
97 *Drosophila* brain samples (Supplementary Video 1). The maximum volume can be seamlessly  
98 extended with longer imaging acquisition.

99

100 Enabled by these advances, we here present a 3D atlas of whole cells and tissues at 4-nm  
101 voxels. The initial datasets (Table 1) consist of ten wild-type biological specimens from cancer  
102 cells to immune cells, and from mouse pancreatic islets to *Drosophila* neural tissues, each  
103 requiring weeks of uninterrupted imaging. The resulting data demonstrate the finest possible  
104 isotropic resolution for whole cell volumes. To highlight some features that are only visible at  
105 the higher resolution, a comparison between 4-nm versus 8-nm voxel sampling is illustrated in  
106 Fig. 1c–k. In particular, the nucleosomes inside its nucleus showing finer details are on the  
107 verge of being individually resolved at 4 nm (Fig. 1c); the detailed Golgi cisternae (Fig. 1f), the  
108 close contacts of ER-mitochondria, and the hollow core of microtubules (Fig. 1i) are only  
109 resolvable at 4 nm. Furthermore, Supplementary Video 1 visualizes the value of finer resolution  
110 with 200x larger volume to better illustrate the newly accessible combined larger size-higher  
111 resolution paradigm. By making these data openly available, we invite biologists to contemplate  
112 analyzing such comprehensive whole cell details, and hope to inspire new questions that  
113 harness complete rather than partial cell data to unveil new insights.

114 **HeLa cells**, human cervical cancer cells, are easily cultured and widely used in cell biology  
115 laboratories as a basic model to test diverse hypotheses. Fig. 2 presents a typical 3D dataset of  
116 an entire HeLa cell. The top panel provides an overview with manually segmented  
117 mitochondrial network in green (Fig. 2a). The bottom row panels show 2D cross-sections of  
118 other cellular organelles, such as the centrosome (Fig. 2b), the Golgi apparatus (Fig. 2c), and  
119 nuclear envelope (Fig. 2d). No single 2D cross-section allows visualizing all centriole sub-distal  
120 appendages, however quick segmentation of the 3D dataset depicts them clearly (red, Fig. 2b).

121 Stereotypical 2D images of the Golgi stacks do not reveal the fenestration details nor long thin  
122 tubular extensions that can readily be seen in 3D segmented single Golgi cisterna (magenta, Fig.  
123 2c). Polyribosome chains on the nuclear envelope are mostly hidden in 2D cross-sections, but  
124 easily resolved and detailed in 3D (yellow, Fig. 2d). Evidently, having isotropic 3D images of such  
125 cells in their entirety can provide an accurate reference to which perturbations in growth,  
126 genetic, environment, etc. can be compared.

127 **Cytotoxic T lymphocytes** (CTLs) are immune cells that have the capacity to identify and destroy  
128 virus-infected or cancerous cells. Upon encountering a target, CTLs form an organized  
129 intercellular interface called the immunological synapse (IS). Signaling at the IS directs the  
130 polarized release of toxic proteins housed in specialized secretory lysosomes called lytic  
131 granules (LGs), which results in target cell death. Due to the important role of CTLs in anti-viral  
132 and anti-cancer immunity, the IS has been the subject of intense scrutiny. Limited single slice  
133 TEM images of CTL:target conjugates have revealed interesting features of the IS, but do not  
134 represent the full scope of this dynamic, three-dimensional structure<sup>10</sup>. Fig. 3 presents a first  
135 comprehensive 3D dataset of a mature murine CTL (green) engaging an ID8 ovarian cancer cell  
136 (cyan). Although there is a minor membrane damage in the area of IS, which most likely  
137 occurred during high-pressure freezing or freeze-substitution or resin embedding<sup>11</sup>, the  
138 isotropic high-resolution information of FIB-SEM imaging provides a unique and complete map  
139 of the complex membrane topology at the interface between T cell and target. Fig. 3b  
140 demonstrates the stereotypical CTL “cupping” of the target cell at the IS through ortho-slices.  
141 Zoomed in images further illustrate the variety of features across this interface including  
142 membrane interdigitation (Extended Data Fig. 2a), flat membrane apposition (Extended Data

143 Fig. 2b), and filopodia of the target cell trapped between the two cells (Extended Data Fig. 2c).  
144 Without the ability of high resolution 3D imaging, these filopodia could be mistaken for vesicles  
145 trapped between T cell and target. Additionally, Supplementary Video 2 depicts the  
146 morphological features in greater details, which further highlights the hallmarks of CTL killing:  
147 T-cell cupping the target cancer cell (Fig. 3b), polarization of the centrosome toward the target  
148 cell<sup>12,13</sup> (Fig. 3c), and the lytic granules with diverse ultrastructures aggregating near the  
149 synapse (Fig. 3d). Such high resolution whole cell FIB-SEM dataset allows for the label-free  
150 localization of all organelles in the T cell including those responsible for target killing and  
151 cytokine secretion.

152 **Pancreatic islets** are micro-organs consisting mainly of beta, alpha, delta, polypeptide cells and  
153 endothelial cells. Among them beta cells are in the majority and secrete insulin stored in  
154 secretory granules (SGs) to maintain blood glucose homeostasis. Few beta cells have been  
155 reconstructed by serial section electron tomography at medium resolution<sup>14</sup> to allow  
156 assessment of subcellular features such as insulin SG number and shape of mitochondria, but  
157 lacking the resolution for imaging of e.g., ER and microtubules. Large-scale high-resolution FIB-  
158 SEM enables the analysis of ultrastructural differences between beta cells within an islet as well  
159 as features that require higher resolution such as ribosomes and the cytoskeleton. Fig. 4a  
160 displays several complete beta cells that are entirely included within the 30 x 20 x 25  $\mu\text{m}^3$   
161 volume. The large volume data allow for studying the interaction of beta cells, e.g., full primary  
162 cilia and their connections to neighboring cells and the intermingling of microvilli (Fig. 4b, 4c).  
163 At 4-nm voxel sampling, we observed ultrastructural differences between insulin SGs (Fig. 4d).  
164 For the first time, we report close contacts of ER and insulin SGs in 3D (Fig. 4e). Ultimately, such



165 high resolution allows the sharp definition of microtubules, single ribosomes, membrane  
166 vesicles, and Golgi cisternae for quantitative measurements (Fig. 4f). The seamless imaging  
167 results in precisely aligned stacks, further facilitating automated 3D segmentation. Specifically,  
168 emerging from these FIB-SEM datasets is a comprehensive 3D representation of microtubule  
169 networks and how they interact with other organelles<sup>15</sup>. We could show that beta cell  
170 microtubules are arranged into non-radial networks which for the most part do not originate  
171 either from centrioles or endomembranes<sup>15</sup>. Moreover, glucose stimulation changes the  
172 number and length of microtubule polymers without changing their overall density<sup>15</sup>. Finally,  
173 we found insulin SGs to be enriched near the plasma membrane in association with  
174 microtubules, independent of the extracellular glucose levels<sup>15</sup>.

175 The **central complex in insect brains** is a highly conserved brain region that controls various  
176 behaviors. Fig. 4g shows higher-resolution images acquired from the fan-shaped body of the  
177 central complex of *Drosophila*. To understand brain functions, it is imperative to identify the  
178 synaptic levels of neuron connectivity over large volumes through key synaptic elements such  
179 as presynaptic T-bars and postsynaptic densities (PSDs) (Fig. 4i, 4j). To investigate if the central  
180 complex contains characteristic synaptic motifs, such as polyadic synapse, rosette synapse, or  
181 any new synaptic motif, validating the synaptic structures with high-resolution data is crucial.  
182 However, a trade-off between volume and resolution often limits capabilities in connectomics  
183 studies, where large-scale neuronal tracing and fine synaptic structure identification are equally  
184 important. High resolution large volume FIB-SEM imaging, shown here, bridges these  
185 capabilities and therefore provides significant possibilities. Such datasets allow reconstruction  
186 of not only the large neuronal objects and glial cells, but also smaller intracellular components

187 such as synaptic vesicles, dense-core vesicles (Fig. 4h), and microtubules (Fig. 4k, 4l). Knowing  
188 the types of synaptic vesicles could add important insights to understand the properties of  
189 synaptic connections. As an example, the terminals of dopaminergic neurons in the fly's  
190 olfactory center were shown to contain both clear and dense-core vesicles<sup>16</sup>, in congruence  
191 with having more than one neurotransmitter<sup>17</sup>.

192 A considerable investment in technology development, equipment resources, and imaging  
193 duration is required to produce large volume high resolution datasets, but the resulting wealth  
194 of such data is unprecedented and comprehensive, covering whole cells with all their organelles  
195 and proteins that can be highlighted with heavy metal stains. Here, we open access to this  
196 volume EM atlas through [OpenOrganelle](https://openorganelle.janelia.org) (<https://openorganelle.janelia.org>)<sup>18</sup>. With access to  
197 these datasets and future ones, biologists can assess whether whole cell structure statistics and  
198 architecture characterization of their interest are visible and possible to measure for evaluating  
199 the merits of further exploration. Additionally, the data can be used as a reference  
200 ultrastructural atlas, providing insights into both known and previously unappreciated  
201 structural details of intracellular organization. Each dataset can be downloaded to mine, while  
202 pre-selected views of interest and cross-sections can be browsed on-line with *neuroglancer*, a  
203 built-in visualization tool. More importantly, these data enable a holistic way of looking into the  
204 cellular world and stand as a foundation of segmentation and analysis efforts that could be  
205 pursued by the scientific community.

206

207 In summary, we achieved large imaging volumes over 100,000  $\mu\text{m}^3$  at the finest possible  
208 isotropic resolution. Thereby, entire mammalian cells and multicellular parts of tissues were

209 imaged at 4-nm isotropic voxels to reveal a more holistic 3D cellular architecture. Ten diverse  
210 datasets of reference wild-type examples are now made accessible through [OpenOrganelle](#)<sup>18</sup>.  
211 This allows the study of complex cell morphology, complete interfaces involved in cell-cell  
212 interactions, and the shapes, volumes, distributions, and relationships of intracellular  
213 organelles. Particularly, the examination of a wild-type cell can encourage further experiments  
214 to compare features against perturbations of disease, mutations, development, or environment  
215 at the whole cell level. These datasets and targeted feature analyses not only could lead to  
216 discoveries of unanticipated new features, but also should spur developments of general tools  
217 to break the bottleneck of 3D data mining. Automation of the time-consuming process of  
218 segmentation on the whole cell scale is a crucial next step. Such an approach is presented in the  
219 associated paper<sup>18</sup>. We believe that open access to rich 3D FIB-SEM datasets will provide  
220 important insights, guidance, and inspiration for the research community to further explore and  
221 address a new broad range of biological questions.  
222

## 223 Reference

---

<sup>1</sup> Lodish, H. et al. *Molecular Cell Biology* (W. H. Freeman, New York, 2016).

<sup>2</sup> Porter, K. R., Claude, A., & Fullam, E. F. A study of tissue culture cells by electron microscopy: methods and preliminary observations. *The Journal of experimental medicine*, **81**(3), 233–246 (1945). <https://doi.org/10.1084/jem.81.3.233>

<sup>3</sup> Denk, W., & Horstmann, H. Serial block-face scanning electron microscopy to reconstruct three-dimensional tissue nanostructure. *PLoS Biol* 2004, **2**:e329 (2004).

<https://doi.org/10.1371/journal.pbio.0020329>

<sup>4</sup> Titze, B. Techniques to prevent sample surface charging and reduce beam damage effects for SBEM imaging. Dissertation. Heidelberg University. 1–112 (2013).

<https://doi.org/10.11588/heidok.00015372>

<sup>5</sup> Xu, C. S. et al. Enhanced FIB-SEM systems for large-volume 3D imaging. *eLife* **6**:e25916 (2017).

<https://doi.org/10.7554/eLife.25916>

<sup>6</sup> Xu, C. S., Hayworth, K. J., & Hess, H. F. Enhanced FIB-SEM systems for large-volume 3D imaging. US Patent 10,600,615, 24 Mar (2020).

<sup>7</sup> Xu, C. S., Pang, S., Hayworth, K. J., & Hess, H. F. Transforming FIB-SEM Systems for Large-Volume Connectomics and Cell Biology. In: Wacker, I., Hummel, E., Burgold, S., Schröder, R. (eds) *Volume Microscopy*. *Neuromethods*, vol 155 (2020). Humana, New York, NY.

[https://doi.org/10.1007/978-1-0716-0691-9\\_12](https://doi.org/10.1007/978-1-0716-0691-9_12)

<sup>8</sup> Xu, C. S. et al. A connectome of the adult *Drosophila* central brain. *bioRxiv* 2020.01.21.911859.

(2020). <https://doi.org/10.1101/2020.01.21.911859>

---

<sup>9</sup> Wu, Y. et al. Contacts between the endoplasmic reticulum and other membranes in neurons.

*PNAS* **114**(24) E4859-E4867 (2017). <https://doi.org/10.1073/pnas.1701078114>

<sup>10</sup> Stinchcombe, J. C., Bossi, G., Booth, S., & Griffiths, G. M. The immunological synapse of CTL contains a secretory domain and membrane bridges. *Immunity*. 2001;15(5):751–761.

[https://doi.org/10.1016/s1074-7613\(01\)00234-5](https://doi.org/10.1016/s1074-7613(01)00234-5)

<sup>11</sup> Bullen, A., Taylor, R. R., Kachar, B., Moores, C., Fleck, R. A. & Forge, A. Inner ear tissue preservation by rapid freezing: Improving fixation by high-pressure freezing and hybrid methods. *Hear. Res.* **315**, 49–60 (2014). <https://doi.org/10.1016/j.heares.2014.06.006>

<sup>12</sup> Kupfer, A. & Dennert, G. Reorientation of the microtubule-organizing center and the Golgi apparatus in cloned cytotoxic lymphocytes triggered by binding to lysable target cells. *J*

*Immunol.* 1984;133(5):2762-2766.

<sup>13</sup> Stinchcombe, J. C., Majorovits, E., Bossi, G., Fuller, S. & Griffiths, G.M. Centrosome polarization delivers secretory granules to the immunological synapse [published correction appears in *Nature*. 2006 Nov 9;444(7116):236]. *Nature*. 2006;443(7110):462–465.

<https://doi.org/10.1038/nature05071>

<sup>14</sup> Noske, A. B., Costin, A. J., Morgan, G. P. & Marsh, B. J. Expedited approaches to whole cell electron tomography and organelle mark-up in situ in high-pressure frozen pancreatic islets. *J.*

*Struct. Biol.* **161**, 298–313 (2008). <https://doi.org/10.1016/j.jsb.2007.09.015>

<sup>15</sup> Müller, A. et al. 3D FIB-SEM reconstruction of microtubule-organelle interaction in whole primary mouse  $\beta$  cells. *J. Cell. Biol.* **220** (2): e202010039 (2021).

<https://doi.org/10.1083/jcb.202010039>

- 
- <sup>16</sup> Takemura, S. Y. et al. A connectome of a learning and memory center in the adult *Drosophila* brain. *eLife* **6**, e26975 (2017). <https://doi.org/10.7554/eLife.26975>
- <sup>17</sup> Aso, Y. et al. Nitric oxide acts as a cotransmitter in a subset of dopaminergic neurons to diversify memory dynamics. *eLife* **8**, e49257 (2019). <https://doi.org/10.7554/eLife.49257>
- <sup>18</sup> Heinrich, L. et al. Automatic whole cell organelle segmentation in volumetric electron microscopy. *bioRxiv* 2020.11.14.382143 (2020). <https://doi.org/10.1101/2020.11.13.382143>

## 225 Methods

226 The initial datasets of seven common wild-type cultured cells (from cancer cells to immune  
227 cells) and three tissue samples (from mouse pancreatic islets to *Drosophila* neural tissues) are  
228 tabulated in Table 1. Detailed procedures are described below.

### 229 Cultured cell sample preparation

230 Cultured cells were cryo-fixed by high pressure freezing (HPF), which vitrified a sample on a  
231 millisecond time scale to best preserve any dynamic structural details. Although HPF sometimes  
232 can cause segregation artifacts (i.e. freezing damage), it minimizes any possibility of artifacts  
233 that might be of concern with chemical fixation. HPF remains the only viable option for non-  
234 chemical fixation of samples more than a few hundred nanometers thick. The subsequent  
235 freeze substitution labeled biomolecules with heavy metals to provide contrast for EM.

#### 236 1. HeLa cells

237 HeLa cells (CCL-2) were purchased from American Type Culture Collection (ATCC). HeLa cells  
238 were maintained in EMEM medium (ATCC, 30-2003) supplemented with 10% FBS (Corning, 35-  
239 011-CV) and 1X penicillin-streptomycin solution (Corning, 30-002-CI). Trypsinized HeLa cells  
240 were seeded on pre-cleaned and edge-coated sapphire coverslips. Immediately prior to  
241 freezing, live cells were inspected to ensure cell morphology and viability. After quality  
242 assurance the cells were transferred to a water jacketed CO<sub>2</sub> incubator (Thermo Fisher  
243 Scientific, Midi 40) kept at 37° C, 5% CO<sub>2</sub>, and 100% humidity while awaiting freezing. Each  
244 coverslip was removed from the incubator immediately prior to the freezing procedure, and  
245 dipped three times in the 25% w/v mixture of Bovine Serum Albumin (BSA) (B4287, Sigma  
246 Aldrich)) in the cell medium, which served as a cryo-protectant to prevent ice crystal

247 formation<sup>19</sup>. The samples were then high-pressure frozen between two Aluminum planchettes  
248 (Technotrade International, 389 and 479) in Wohlwend HPF Compact 02 High Pressure Freezing  
249 Machine (Technotrade International). Once the samples were frozen, they could be stored  
250 indefinitely in liquid nitrogen for subsequent freeze-substitution (FS) and resin embedding (RE).  
251 FS was performed using automated FS machine (AFS2, Leica Microsystems): coverslips were  
252 transferred to cryotubes containing FS media (2% OsO<sub>4</sub>, 0.1% Uranyl Acetate (UA), and 3%  
253 water in acetone) under liquid nitrogen, followed by a programmed FS schedule. Resin  
254 embedding was performed immediately after FS. Samples were removed from the AFS2  
255 machine, washed 3 times in anhydrous acetone for a total of 10 min and embedded in Eponate  
256 12 which was polymerized for 48 hours at 60°C. Following EPON embedding, the coverslip was  
257 separated from the resin block containing the cells by sequential immersion in liquid nitrogen  
258 and hot water. EPON was chosen as the initial embedding resin due to less embedding artifacts.  
259 However, EPON generates streaking artifact during FIB-SEM imaging<sup>5</sup>. A thin layer (5–10 μm) of  
260 Durcupan on the specimen surface facing the FIB beam can effectively mitigate such streaks  
261 during FIB-SEM imaging. Therefore, once the coverslip was removed, the exposed surface was  
262 immediately re-embedded in Durcupan ACM resin (Sigma Aldrich, set 44610). The detail  
263 procedures of coverslip preparation, high pressure freezing, free substitution, and resin  
264 embedding are presented in the Supplementary Information.

## 265 2. Cytotoxic T cell and T cell/Cancer cell conjugate (CTLs)

266 To generate CTLs from OT-I mice (Jackson Labs), splenocytes were isolated and stimulated with  
267 10nM OVA257-264 peptide (AnaSpec, Fremont, CA, USA) in 10% RPMI (RPMI 1640 plus 10%  
268 fetal bovine serum (Fisher), 2mM L-glutamine, 50U/mL penicillin/streptomycin, and 50μM β-



269 mercaptoethanol. Following 3 days of stimulation, cells were resuspended in complete media  
270 plus 10 IU/mL recombinant human IL-2 (rHIL-2, Roche), and seeded in fresh media at  $0.5 \times 10^6$   
271 cells/mL every 48 hours. ID8 cancer cell line (ATCC) was grown in RPMI media (Gibco) with 10%  
272 FBS (Gibco).

273 In-vitro activated CTLs from Ova-transgenic (OT-I) mice were combined with adherent ID8  
274 murine ovarian cancer cells. To facilitate recognition of cancer cells by the OTI-I CTLs, ID8 cells  
275 suspended in complete medium (RPMI with 10% FBS, Gibco) were incubated with OVA<sub>257-264</sub>  
276 SIINFEKL peptide for 1 hour at 37°C. The cells were washed three times with complete medium,  
277 and  $10^5$  cells were added to each well of a 24-well plate. Each well contained a single sapphire  
278 coverslip coated with human Fibronectin (Corning). The ID8 cells were allowed to settle and  
279 adhere for 2 hours in an incubator at 37°C/5% CO<sub>2</sub>. At this time, the media in the well was  
280 replaced with 250uL phenol-red free RPMI (Gibco). Care was taken to ensure that media and  
281 cells were stored in 37°C/5% CO<sub>2</sub> for all incubation periods. Immediately after changing the  
282 media,  $10^5$  CTLs in 50uL complete medium were added to the well. The CTLs were allowed 7  
283 minutes to find their targets and secrete lytic granules before fixation through high pressure  
284 freezing. The relatively short incubation time favors capture of CTL:target conjugates in an  
285 early-stage of interaction.

286 The remaining cryofixation, FS, and resin embedding procedures were identical to those  
287 described for HeLa cells. The detail procedures are presented in the Supplementary  
288 Information.

## 289 Tissue sample preparation

### 290 1. Mouse pancreatic islets

291 Pancreatic islets of 9-week-old C57BL/6 mice were isolated as previously described<sup>20</sup>. They  
292 were cultured overnight in standard culture media (RPMI 1640 (Gibco) with 10% FBS, 20 mM  
293 HEPES, 100 U/ml each penicillin and streptomycin) containing 5.5 mM glucose. Prior to high  
294 pressure freezing the islets were subjected to 1 hr incubation in Krebs-Ringer buffer containing  
295 either 3.3 mM or 16.7 mM glucose.

296 Islets were frozen with a Leica EM ICE high pressure freezer (Leica Microsystems, Germany) and  
297 kept in liquid nitrogen until freeze substitution. Although freezing damage was observed in  
298 couple nuclei, the preservation of cytoskeletal elements benefits from this fixation. High  
299 pressure frozen islets were substituted as previously published<sup>21</sup> or according to a novel  
300 protocol: first the samples were substituted in a cocktail containing 2% OsO<sub>4</sub>, 1% UA, 0.5%  
301 glutaraldehyde, 5% H<sub>2</sub>O in Acetone with 1% Methanol at -90°C for 24 hours. The temperature  
302 was raised to 0°C over 15 hours followed by 4 washes with 100% acetone for 15 min each and  
303 an increase in temperature to +22°C. Afterwards the samples were incubated in 0.2%  
304 thiocarbohydrazide in 80% methanol at RT for 60 min followed by 6 x 10 min washes with 100%  
305 acetone. The specimens were stained with 2% OsO<sub>4</sub> in acetone at RT for 60 min followed by  
306 incubation in 1% UA in acetone + 10% methanol in the dark at RT for 60 min. After 4 washes in  
307 acetone for 15 min each they were infiltrated with increasing concentrations of Durcupan resin  
308 in acetone followed by incubation in pure Durcupan and polymerization at 60°C. For quality  
309 control the blocks were sectioned with a Leica LC6 ultramicrotome (Leica microsystems) and  
310 300 nm sections were put on slot grids containing a Formvar film. Tilt series ranging from -63°

311 to +63° were acquired with a F30 electron microscope (Thermo Fisher Scientific) and  
312 reconstructed with the IMOD software package<sup>22</sup>.

## 313 2. *Drosophila* brain samples (fan-shaped body and accessory calyx)

314 While thin tissue samples (< 200- $\mu$ m-thick) can be cryo-fixed, in many cases thick tissue  
315 specimens can not (e.g., large brain tissue) thus requiring various chemical fixation and staining  
316 protocols. *Drosophila* brain tissues from 5-day-old adult (Genome type: iso Canton S G1 x  
317 w1118 iso 5905) were prepared according to Progressive Lowering of Temperature and Low  
318 Temperature Staining (PLT-LTS) progressive heavy metal enhancement protocol described  
319 previously<sup>23</sup>. In details, after tissue dissection and pre-fixation, we osmicated tissue in 1% OsO<sub>4</sub>,  
320 then 1.5% K ferrocyanide, followed by a complete wash. Afterwards, a transfer to 1%  
321 thiocarbohydrazide for 15 min at 22°C, then a complete wash, followed by 2% osmium for 30  
322 min at 22°C. After osmication, we stained in lead aspartate for 30 min at 55°C first, then 1 h at  
323 22°C. Finally, the tissue was dehydrated in a Leica AFS freeze-substitution chamber: the  
324 temperature was dropped from 4°C to -25°C, and the concentration of acetone or ethanol was  
325 increased for 20 min in each of 10%, 30%, 50%, 70%, 80%, 90%, and 97%. The subsequent low  
326 temperature *en bloc* staining was performed in either 0.2% uranyl acetate in acetone, or 1%  
327 EPTA in 97% ethanol. Specimens were infiltrated and embedded in Durcupan.

## 328 Preparation for FIB-SEM

329 After Durcupan re-embedding, a 3D X-Ray tomogram of the entire block was taken using an  
330 XRadia-510 Versa micro X-Ray system (Carl Zeiss X-ray Microscopy, Inc.). The 3D X-Ray  
331 tomograms allowed for robust Region of Interest (ROI) selection. Specifically, it identified cells  
332 with good morphology (for example a properly shaped cell, a cell in a desired stage of mitosis, a

333 T-cell attacking a cancer cell, etc.), and also determined the proper orientation for the tissue  
334 samples. Once a potential ROI was identified, the sample block was then re-mounted to the top  
335 of a 1 mm copper post (using Durcupan) which was in contact with the metal-stained sample  
336 for better charge dissipation, as previously described<sup>5</sup>. Each sample was oriented on the copper  
337 post to allow the shortest distance along FIB milling direction. A small vertical sample post was  
338 trimmed to the ROI with a width of ~100  $\mu\text{m}$  and a depth of 60–80  $\mu\text{m}$  in the direction of the  
339 ion beam for each sample. Sample trimming used an ultramicrotome (EM UC7, Leica  
340 Microsystems), was done in few iterations with X-Ray tomogram collected after each step.  
341 Once the desired ROI was trimmed, a thin layer of conductive material of 10-nm gold followed  
342 by 100-nm carbon was sputtered using a Gatan PECS 682 High-Resolution Ion Beam Coater. The  
343 coating parameters were 6 keV, 200 nA on both argon gas plasma sources, 10 rpm sample  
344 rotation with 45-degree tilt.

#### 345 FIB-SEM system advances

346 A Zeiss Gemini 500 and multiple Zeiss Merlin SEM systems were customized for this work to  
347 enable the two orders of magnitude improvement in imageable volume (from ~500  $\mu\text{m}^3$  to  
348 greater than 100,000  $\mu\text{m}^3$ ) compared to our prior work<sup>5</sup>. Such improvement primarily comes  
349 from: 1) higher precision and stability of FIB milling control to extend reliable long-term  
350 acquisition to 4-nm voxels, and 2) enhanced SEM signal detection using secondary electrons to  
351 achieve faster imaging, hence reduce electron radiation energy density (from ~400 to ~80  
352 keV/nm<sup>3</sup>) that further improves FIB milling control.  
353 Specifically, to ensure precise and stable milling at 4-nm sampling, we integrated a more stable  
354 FIB column (Capella from Zeiss) and repositioned at 90 degrees to the SEM column (Fig. 1a).

355 The Capella FIB column provided higher practical milling currents up to 30 nA compared to 7 nA  
356 of the Magnum FIB column (Thermo Fisher Scientific, previously FEI) used in our prior work<sup>5</sup>.  
357 We further tightened its FIB emission current control band from  $\pm 100$  pA to  $\pm 50$  pA to obtain a  
358 consistent milling beam profile. We also re-configured the milling closed-loop control (Fig. 10 in  
359 Xu et al., 2017<sup>5</sup>) to further reduce the milling variation between FIB reheat cycles thus enabling  
360 long-term acquisition at high electron radiation energy density. This FIB milling optimization  
361 sufficiently reduced milling artifacts hence allowed for the switching of SEM signal detection  
362 from backscattered electrons to secondary electrons for faster imaging (600 V vs. 0 V specimen  
363 bias in Fig. 12 of Xu et al., 2017<sup>5</sup>). The new SEM signal detection scheme lowered electron  
364 radiation energy density by 5x (from  $\sim 400$  to  $\sim 80$  keV/nm<sup>3</sup>), which in turn further mitigated FIB  
365 milling artifacts and instability. In addition, customized 100- $\mu$ m-thick molybdenum apertures  
366 were laser machined to define more accurate and consistent FIB milling currents, and to  
367 achieve more than 2x longer lifetime; and the custom NI LabVIEW control software was re-  
368 designed: to include new configurations of FIB milling closed-loop control which improve milling  
369 variation; and to switch from the Zeiss RemCon serial port communication protocol to the Zeiss  
370 API which reduced the overhead by several seconds per imaging/milling cycle.

371 The optimization of SEM imaging conditions was then guided by the following principles. The  
372 isotropic resolution limits are convoluted by the waist size of the incoming primary electron  
373 beam and the scattering volume of the penetrating primary electrons. While spherical and  
374 chromatic aberrations of the electromagnetic lenses can be mitigated by smaller beam currents  
375 at modest numerical aperture to achieve the best beam focus and x-y resolution, lower primary  
376 beam landing energy generates fewer scattering events, resulting in smaller scattering volume

377 which improves resolutions along all three axes. However, any further reduction below the  
378 optimal energy will result in a reduced scattering ratio of the heavy metal stain atoms over  
379 lighter background atoms of the sample resin, thus fading contrast. Through investigating a  
380 multi-dimensional operation space, we found that a beam current of 200 to 300 pA and a  
381 landing energy of 700 to 900 eV are optimal for isotropic 4-nm imaging.  
382 Such positive synergy between faster SEM scanning and robust FIB milling has extended reliable  
383 imaging acquisition at 4-nm isotropic voxels from less than a week to months. Primarily limited  
384 by time, the maximum volume can be seamlessly extended.

#### 385 [FIB-SEM imaging](#)

386 As summarized in Table 1, all samples were imaged by a 0.14–0.3 nA electron beam with 0.7–  
387 1.2 keV landing energy at 0.1–2.0 MHz. In most cases, both backscattered and secondary  
388 electron signals were collected by InLens detector to provide better signal-to-noise ratio. The  
389 time to acquire these volumes ranged from two to five weeks of uninterrupted imaging. Faster  
390 SEM scanning rates (5x–10x scanning speed improvement) were applied on *Drosophila* samples  
391 with stronger staining contrast while maintaining similar image quality, thus achieving  
392 maximum volume of 175,000  $\mu\text{m}^3$  within three-week imaging.  
393 For all samples, the x-y pixel size was set at 4 nm. A subsequently applied focused Ga<sup>+</sup> beam of  
394 15 nA at 30 keV strafed across the top surface and ablated away 4 nm of the surface. The newly  
395 exposed surface was then imaged again. The ablation – imaging cycle continued for two to five  
396 weeks of uninterrupted imaging to complete FIB-SEM imaging one sample. The sequence of  
397 acquired images formed a raw imaged volume, followed by post processing of image  
398 registration and alignment using a Fiji plugin based on Scale Invariant Feature Transform (SIFT)

399 algorithm<sup>24</sup> to form isotropic 4 nm voxels. The final aligned stack consisted of an isotropic  
400 volume, containing multiple complete cells, which can be viewed in any arbitrary orientations.

#### 401 Evaluation of FIB-SEM resolution

402 In order to evaluate the actual resolution in the acquired FIB-SEM datasets we analyzed the  
403 transitions of the edges of the ribosomes abundant within the cell volumes. Ribosomes are  
404 macromolecular machines consisting of RNA and associated proteins. Their small size (20–30  
405 nm), abundance in the cytoplasm of living cells, and the fact that they are stained with high EM  
406 contrast makes them good candidates for resolution evaluation.

407 First, we selected volumes of approximately 1000–2000 x 1000 x 1000 pixels in cultured cell  
408 datasets. These volumes were selected in the middle of datasets in areas with large number of  
409 ribosomes. We then calculated histograms of grey level values in these volumes and subtracted  
410  $\sim 0.8 * \text{histogram max}$  to bring the average cytoplasmic material signal level close to 0. We then  
411 used the Laplacian of Gaussian (LoG) algorithm (part of Python scikit-image package<sup>25</sup>) to select  
412 blobs. We set the limit of standard deviation for LoG between 1 and 2.5 pixels (all these  
413 datasets have 4-nm voxels) to ensure that selected blobs were predominantly ribosomes.  
414 Filters were used to exclude the following blobs: average value below zero (this meant LoG  
415 algorithm failed), edge value above 0.4 times of max value or 37%–63% transition longer than  
416 15nm (the latter two happen where there is another blob or another feature with high signal  
417 level in close proximity—making subsequent edge transition analysis inaccurate), amplitudes  
418 below certain threshold, so that at least approximately 3000 blobs per dataset were remained  
419 for analysis. The edge transitions in all three directions were analyzed for these remaining

420 blobs, in particular we determined 37%–63% transitions (the value used by Zeiss in their  
421 resolution estimation) and 20%–80% transitions (close to 1 sigma value).  
422 The summaries of the 37%–63% transitions and 20%–80% transitions for the 3D ribosome blobs  
423 selected in cultured cell datasets are plotted in Fig. 1b. The histograms of the 37%–63%  
424 transitions for these datasets are shown in Extended Data Fig. 3. The examples of 3D blobs for  
425 each dataset are presented in Extended Data Fig. 4–10. For each dataset the cross-sections and  
426 transition analysis for 3 brightest and 3 dimmest ribosomes are shown.

#### 427 [Accurate determination of FIB-SEM milling rate](#)

428 The position of a sample block face was measured by the SEM beam and the FIB beam  
429 independently. An in-line auto focus routine<sup>6</sup> kept the SEM images in focus throughout the  
430 entire image acquisition. While the working distance of the SEM beam detected the block face  
431 position by measuring its distance from the SEM objective lens, the FIB milling position under  
432 closed-loop control indicated the block face position directly from the orthogonal angle. As the  
433 sample block face being imaged then milled away layer-by-layer, the SEM working distance and  
434 the FIB beam position tracked the block face location accordingly. Therefore, we estimated the  
435 total thickness milled away by FIB based on the changes of either SEM working distance or FIB  
436 milling position from the beginning to the end of the FIB-SEM acquisition. The average milling  
437 rate of z-step was then calculated as the total milling depth divided by the number of image  
438 frames. Here we report the average z-scaling factors derived from both measurement  
439 approaches in Extended Data Table 1, which can be used to scale the dataset to generate real  
440 isotropic voxels. For example, HeLa Cell 2017-06-21 dataset has a z-scaling factor of 1.31 which  
441 means the actual z-step is averaged at 5.2 nm instead of 4.0 nm.



## 442 [Image emulation to visualize the value of finer resolution](#)

443 To emulate 8-nm images, we first applied a 6-nm Gaussian blur filter and then added Gaussian  
444 noise with a standard deviation of 22 to 4-nm images. The higher shot noise at 8-nm sampling  
445 was expected due to the 10x lower electron dose of  $\sim 12$  e/nm<sup>3</sup>, compared to that of  $\sim 120$   
446 e/nm<sup>3</sup> at 4-nm sampling. The 6-nm Gaussian blur and added noise (Fig. 1d, g, and j) were  
447 underestimated compared to that of the real 8-nm images (Fig. 1e, h, and k) collected on the  
448 same type of specimens. The 8-nm emulated images with comparisons to 4-nm images and real  
449 8-nm images are shown in Fig. 1c–k and Supplementary Video 1.

## 450 [Data availability](#)

451 All raw and segmented datasets in this work are available on OpenOrganelle website  
452 (<https://openorganelle.janelia.org>).

## 453 [Code availability](#)

454 FIB-SEM image acquisition LabVIEW code used in this work is available from  
455 [https://github.com/cshanxu/Enhanced\\_FIB-SEM](https://github.com/cshanxu/Enhanced_FIB-SEM)

456 Python code for resolution characterizations using ribosomes is available from  
457 [https://github.com/gleb-shtengel/FIB-SEM\\_resolution\\_evaluation](https://github.com/gleb-shtengel/FIB-SEM_resolution_evaluation)

## 458 [Acknowledgements](#)

459 We thank K. Hayworth and W. Qiu at Howard Hughes Medical Institute (HHMI) Janelia Research  
460 Campus (JRC) for invaluable discussions and data collection support. We gratefully acknowledge  
461 P. Rivlin, S. Plaza, and I. Meinertzhagen for JRC EM shared resource and FlyEM project team

462 support on staining protocols development. We thank the electron microscopy facility of MPI-  
463 CBG and of the CMCB Technology Platform at TU Dresden for their services. We also thank Y.  
464 Wu from Pietro De Camilli's laboratory at Yale for advice.

## 465 Funding

466 C.S.X., S.P., G.S., S.T., Z.L., H.A.P., N.I., D.B., A.V.W., M.F., T.C.W., J.L.-S., H.F.H. are funded by  
467 Howard Hughes Medical Institute (HHMI). A.M. received support from the Carl Gustav Carus  
468 Faculty of Medicine at TU Dresden via a MeDDrive GRANT. A.M. and M.S. were supported with  
469 funds from the German Center for Diabetes Research (DZD e.V.) by the German Ministry for  
470 Education and Research (BMBF), from the Germain-Israeli Foundation for Scientific Research  
471 and Development (GIF) (grant I-1429-201.2/2017), from the German Research Foundation  
472 (DFG) jointly with the Agence nationale de la recherche (ANR) (grant SO 818/6-1) to M.S.. H.K.H  
473 and S.B.v.E. are funded by NIAID grant R01AI138625. R.V.F. is supported by NIH R01GM124348.  
474 T.C.W. is supported by NIH R01GM097194. J.C. is a fellow of the Damon Runyon Cancer  
475 Research Foundation.

## 476 Author Contributions

477 C.S.X. and H.F.H. supervised the project; C.S.X., S.P., G.S., and H.F.H. wrote the manuscript with  
478 input from all co-authors; C.S.X. developed enhanced FIB-SEM platform for large volume high  
479 resolution imaging, and optimized imaging conditions; C.S.X., S.P., and G.S. conducted FIB-SEM  
480 experiments; C.S.X. and S.P. performed image post processing; S.P., G.S., A.M., A.T.R., H.K.H.,  
481 S.B.v.E., Z.L., H.A.P., N.I., J.C., A.V.W., and M.F. prepared samples; G.S., A.M., A.T.R., and S.T.

482 analyzed data; D.B. prepared and uploaded data to OpenOrganelle website; S.B.v.E., T.C.W.,  
483 R.V.F., J.L.-S., I.M., and M.S. proposed biological questions and provided samples.

#### 484 **Competing interests**

485 Portions of the technology described herein are covered by U.S. Patent 10,600,615 titled  
486 “Enhanced FIB-SEM systems for large-volume 3D imaging”, which was issued to C.S.X., K.J.H.,  
487 and H.F.H., and assigned to Howard Hughes Medical Institute on March 24, 2020.

488

489 **Figures**

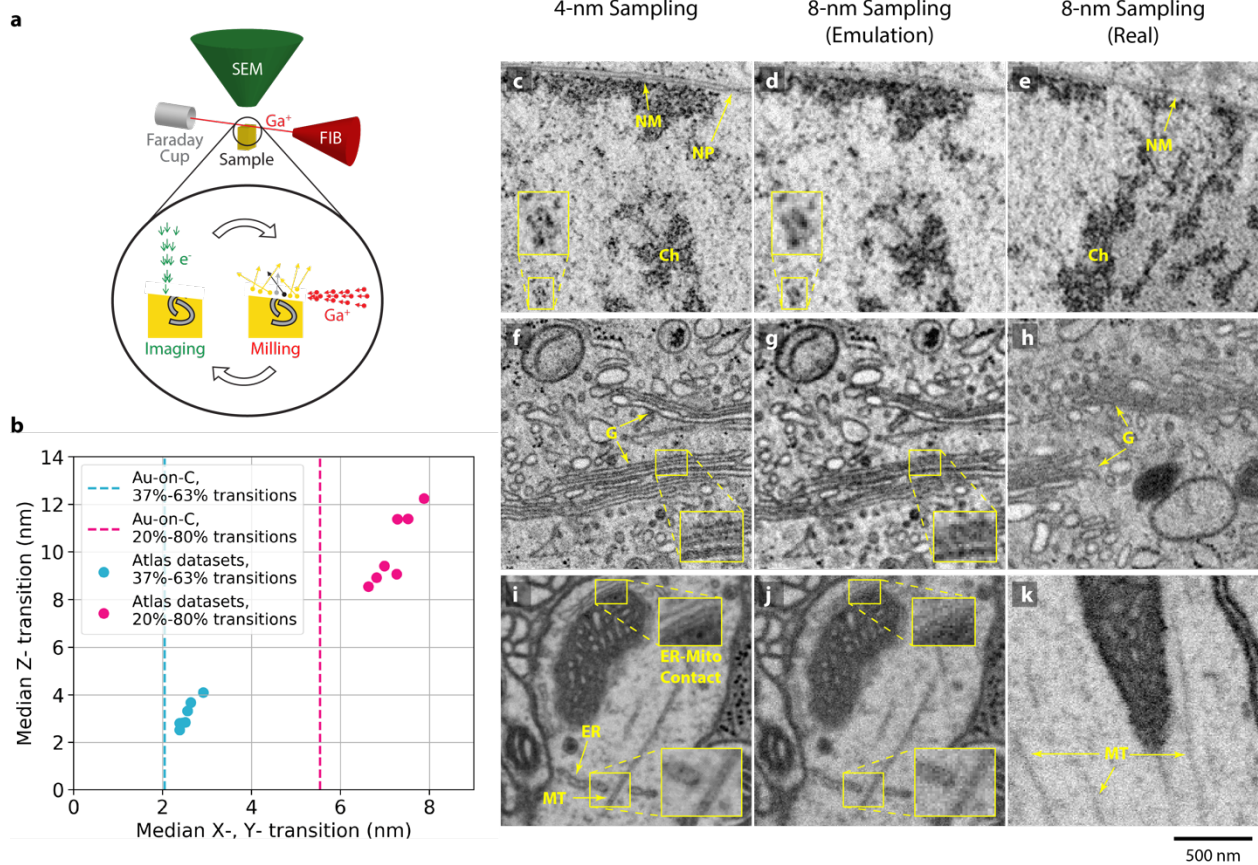

490

491 **Fig. 1 Enhanced FIB-SEM configuration, operation, and resolution.** **a**, Sketch of FIB milling and  
 492 SEM imaging. The two operations iterate alternately to generate 3D whole cell image stacks, **b**,  
 493 Resolution characterization using transitions at the edges of gold nanoparticles on a carbon  
 494 substrate and ribosomes in cultured cells. The vertical dash lines indicate the edge transitions of  
 495 gold nanoparticles, the round dots indicate the edge transitions of ribosomes along x-y and z  
 496 axes. Each dot represents the average value from more than 3000 ribosomes in one of the  
 497 seven cultured cell samples. **c–k**, Comparison of lower current/higher resolution 4-nm sampling  
 498 and 8-nm sampling. Left column shows images acquired at 4-nm sampling that matches the  
 499 resolutions shown in **b**. The middle column shows the emulated 8-nm images (details in

500 Methods Section), while the right column shows the real 8-nm sampling images. **c**, Nucleus of  
501 the interphase HeLa cell from Fig. 2d shows fine details of chromatin (Ch), nuclear membrane  
502 (NM), and nuclear pore (NP). Nucleosomes are less resolved in **d**, the emulated 8-nm sampling  
503 image, and in **e**, the real 8-nm sampling image of an interphase HeLa cell. **f**, Golgi (G) cisternae  
504 of the interphase HeLa cell from Fig. 2c are better resolved at 4-nm sampling compared to the  
505 emulated 8-nm sampling image shown in **g** and the interphase HeLa cell imaged at 8-nm  
506 sampling shown in **h**. **i**, *Drosophila* brain sample from Supplementary Video 1 shows well-  
507 resolved hollow core of a microtubule (MT) and the close contact between endoplasmic  
508 reticulum (ER) and mitochondria (Mito), which are not distinguishable in **j**, the emulated 8-nm  
509 sampling image. **k**, The real 8-nm sampling image of blurry microtubules of a *Drosophila* brain  
510 sample with higher shot noise and less resolved microtubules compared to those shown in **j**.  
511 Scale bar, 500 nm in all images.

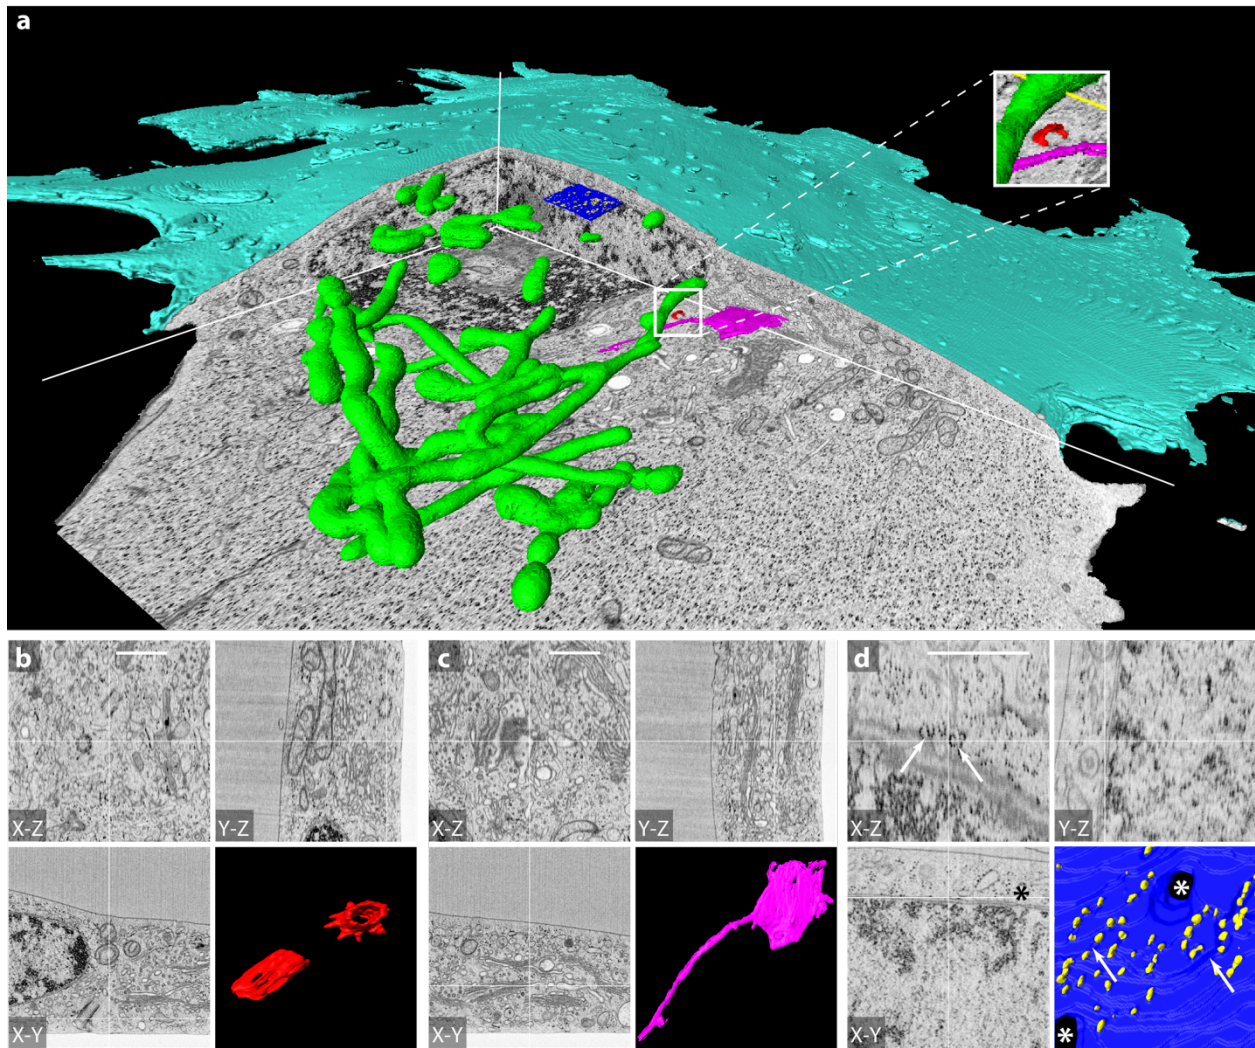

512

513 Fig. 2 **Interphase HeLa cell.** **a**, FIB-SEM overview with cutaway, and manually segmented  
514 interior features (mitochondria, green; centrosomes, red; one cistern of a Golgi stack, magenta;  
515 a segment of nuclear membrane, blue, polyribosome chains, yellow). Zoomed in cross-sections  
516 of three select areas containing: **b**, Centrosomes, **c**, Golgi stack, and **d**, Nucleus, polyribosomes  
517 indicated by arrows, and nuclear pores indicated by asterisks. Scale bars are 1  $\mu\text{m}$ .

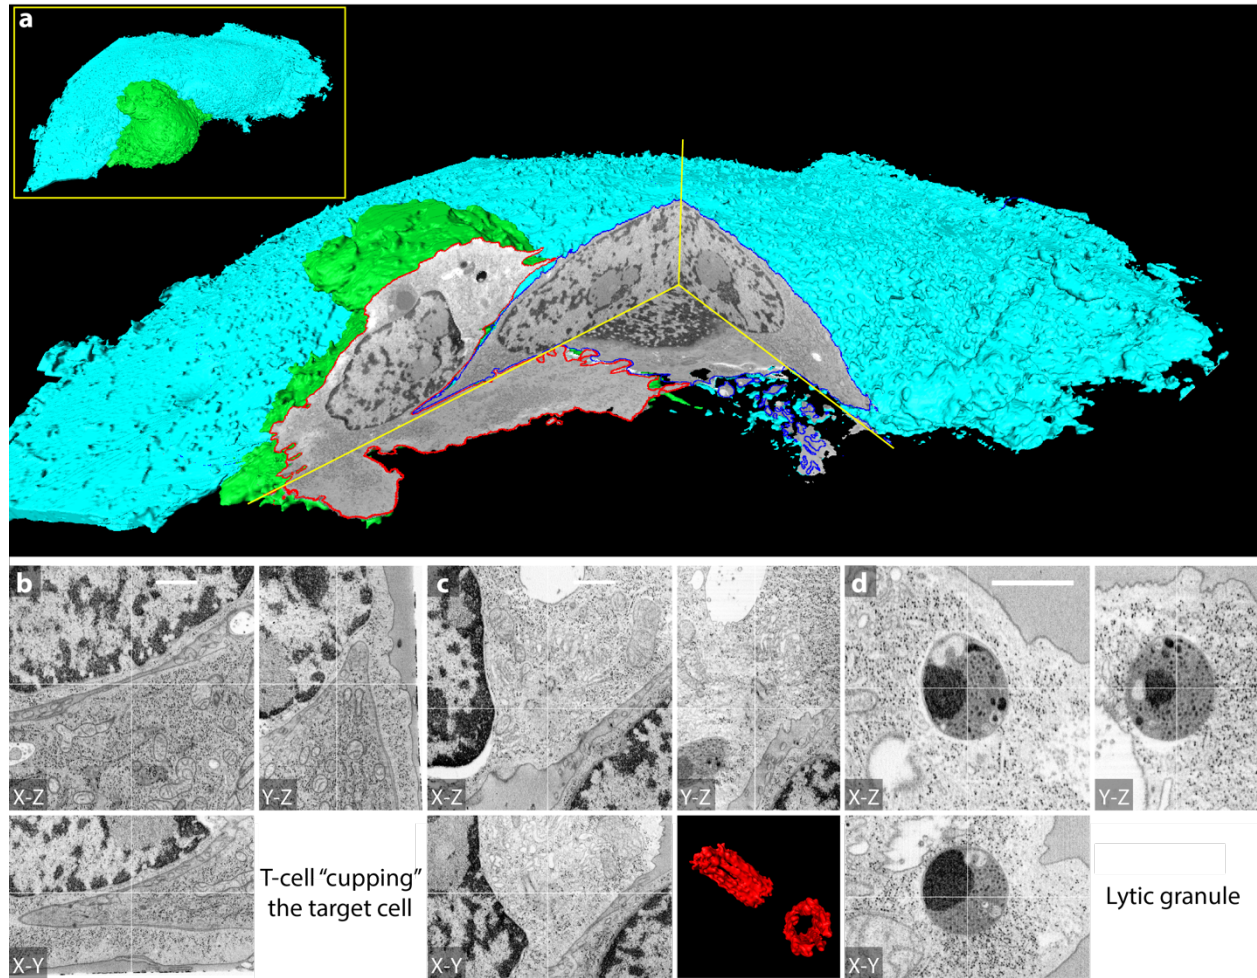

518

519 **Fig. 3 Murine CTL engaging an ovarian cancer cell. a**, FIB-SEM overview with cutaway, and  
520 manually segmented membranes of CTL (green surface and red contour) and cancer cell (cyan  
521 surface and blue contour). Zoomed in cross-sections highlight the signatures of a productive  
522 immunological synapse: **b**, CTL cell “cupping” the target cancer cell, **c**, Polarized centrosome,  
523 and **d**, Lytic granule showing unique ultrastructures. Scale bars are 1  $\mu\text{m}$ .

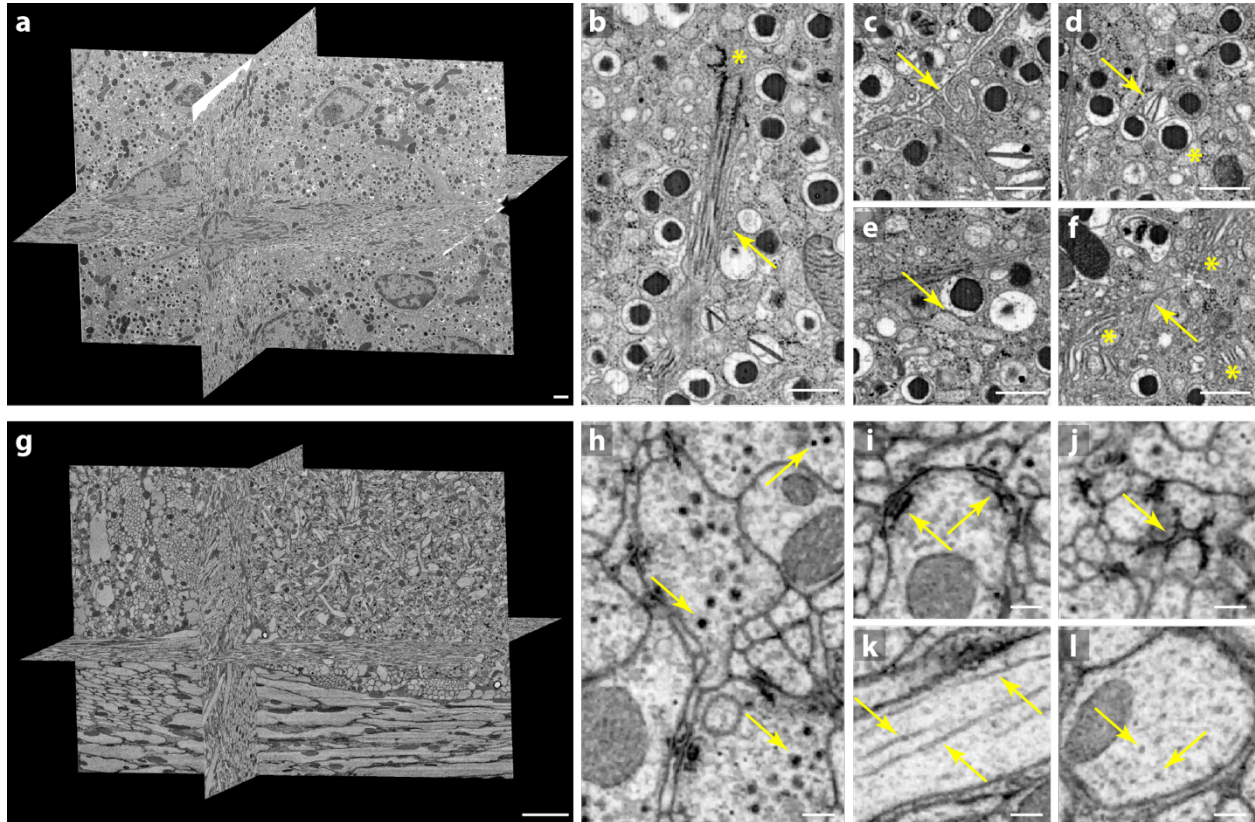

524

525 Fig. 4 **Tissue sample datasets.** **a**, Pancreatic islets treated with 16.7 mM glucose containing  
526 several complete beta cells with detailed structures shown in **b**, A primary cilium with axoneme  
527 (arrow) and centrioles (asterisk), **c**, Intermingled microvilli (arrow), **d**, Ultrastructural diversity  
528 among insulin SGs containing rod-shaped (arrow) or spherical crystals (asterisk), **e**, Contacts of  
529 ER and insulin SGs (arrow), **f**, Microtubules (arrow), Golgi apparatus (asterisks) and ribosomes.  
530 **g**, *Drosophila* fan-shaped body with detailed structures shown in **h**, Dense-core vesicles of  
531 different sizes (arrows), **i**, Multiple synaptic sites viewed from the side (arrows), **j**, A presynaptic  
532 T-bar viewed from the top (arrow), **k**, A longitudinal-section view of microtubules (arrows), **l**, A  
533 cross-section view of microtubule arrays (arrows). Scale bar, 1  $\mu\text{m}$  in **a**, 500 nm in **b–f**, 5  $\mu\text{m}$  in  
534 **g**, 200 nm in **h–l**.



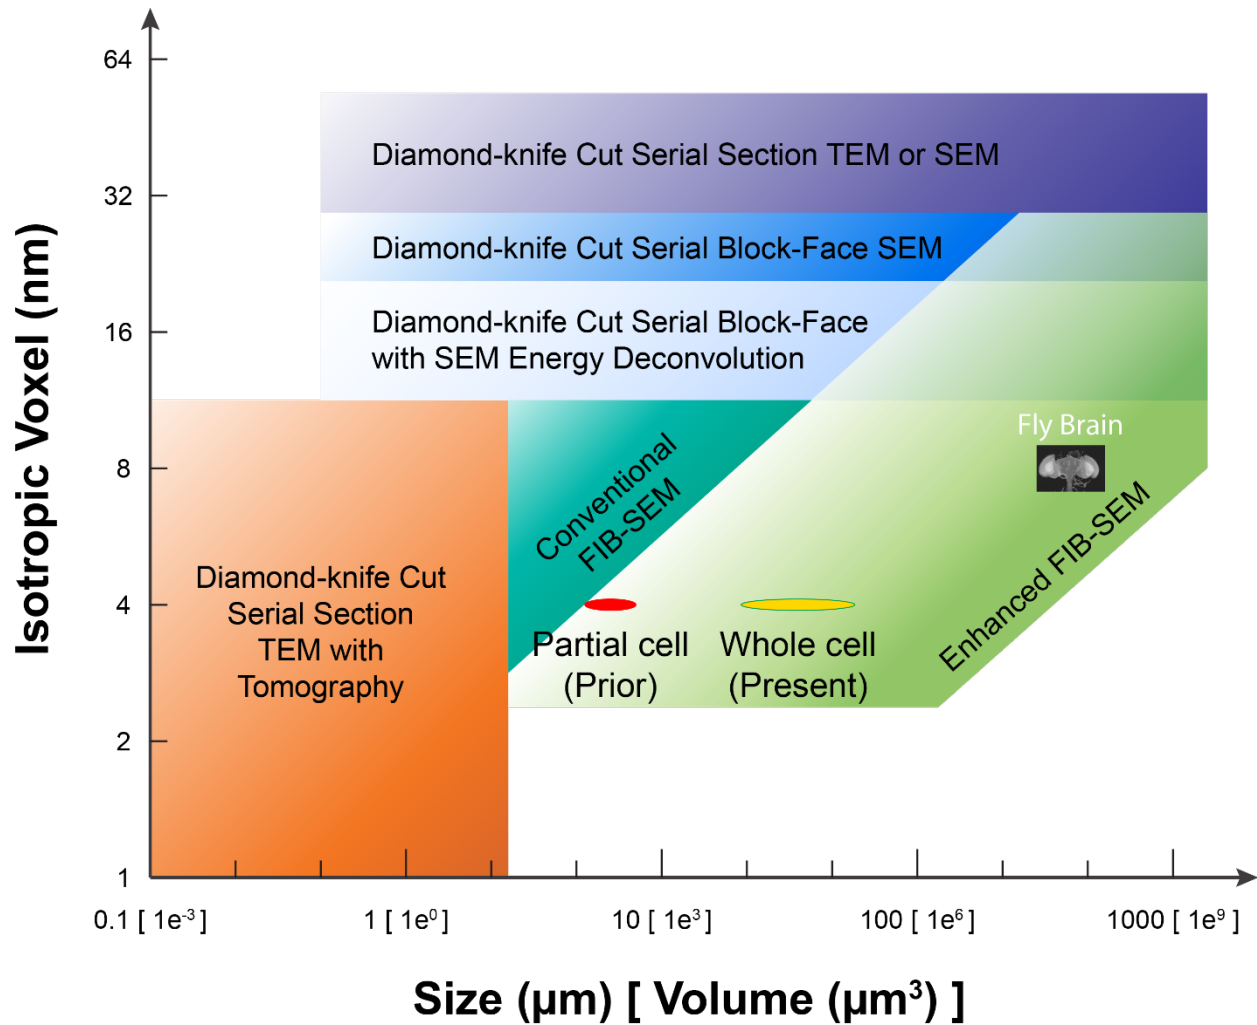

535

536 Extended Data Fig. 1 **Isotropic voxel (representing the minimal voxel size dictated by the**  
 537 **worst-case axial resolution) vs. volume for comparing different volume EM methods.** The light  
 538 green space represents the Resolution-Volume regime accessible with enhanced FIB-SEM  
 539 technology through long term imaging. The present work of whole cell volumes at 4-nm  
 540 isotropic voxels matching the resolutions shown in Fig. 1b is colored in yellow, compared to the  
 541 prior work of smaller volumes colored in red. Adopted from Xu et al., 2017<sup>5</sup> with modifications.

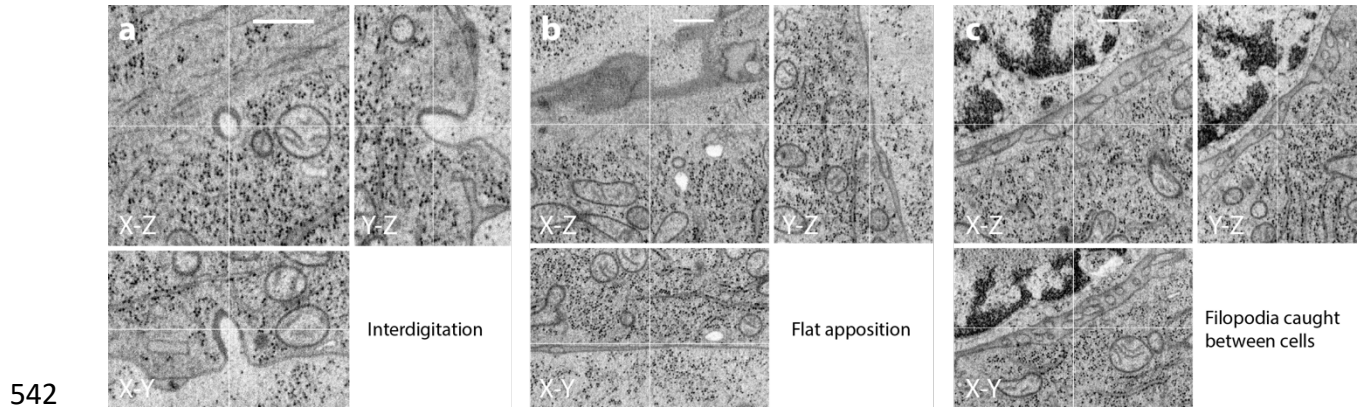

543 Extended Data Fig. 2 **Murine CTL engaging an ovarian cancer cell.** Zooms on regions showing  
544 different immunological synapse topology features. **a**, Interdigitation, **b**, Flat apposition, and **c**,  
545 Filopodia caught between cells. Scale bars are 0.5  $\mu\text{m}$ .

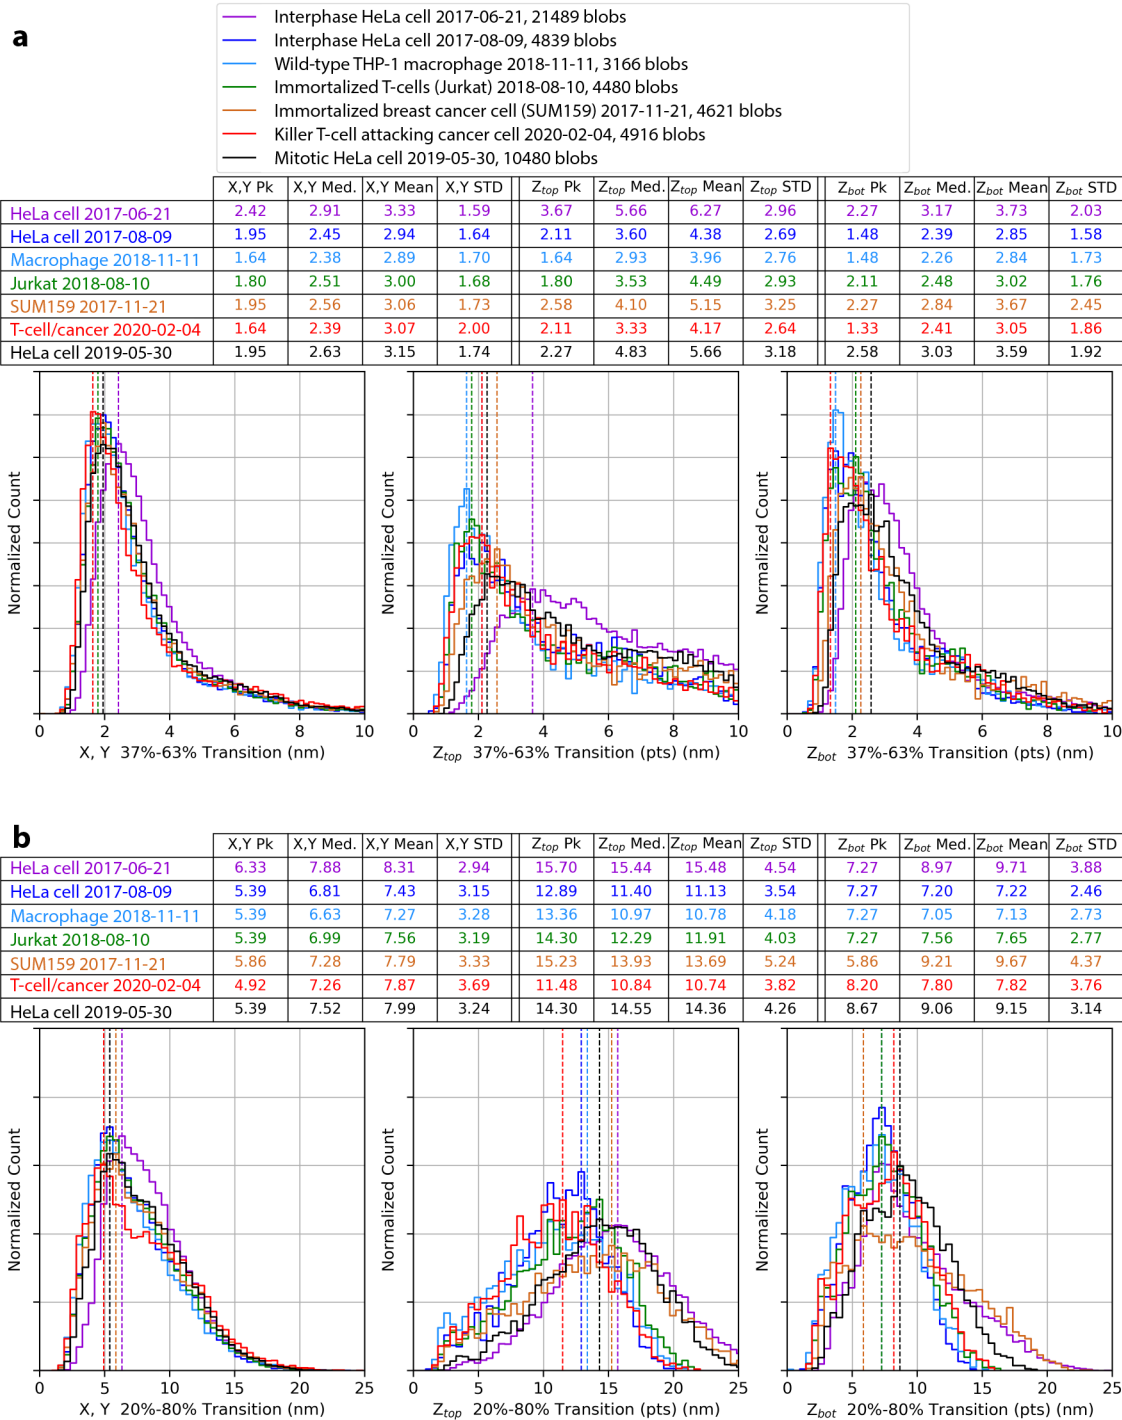

546

547 Extended Data Fig. 3 **Edge transition distributions determined from ribosomes in cultured cells**

548 **datasets.** Distributions of 37%–63% (**a**) and 20%–80% (**b**) transition distances in X-, Y- (left), Z<sub>top</sub>-

549 (center), and Z<sub>bot</sub>- (right) directions.

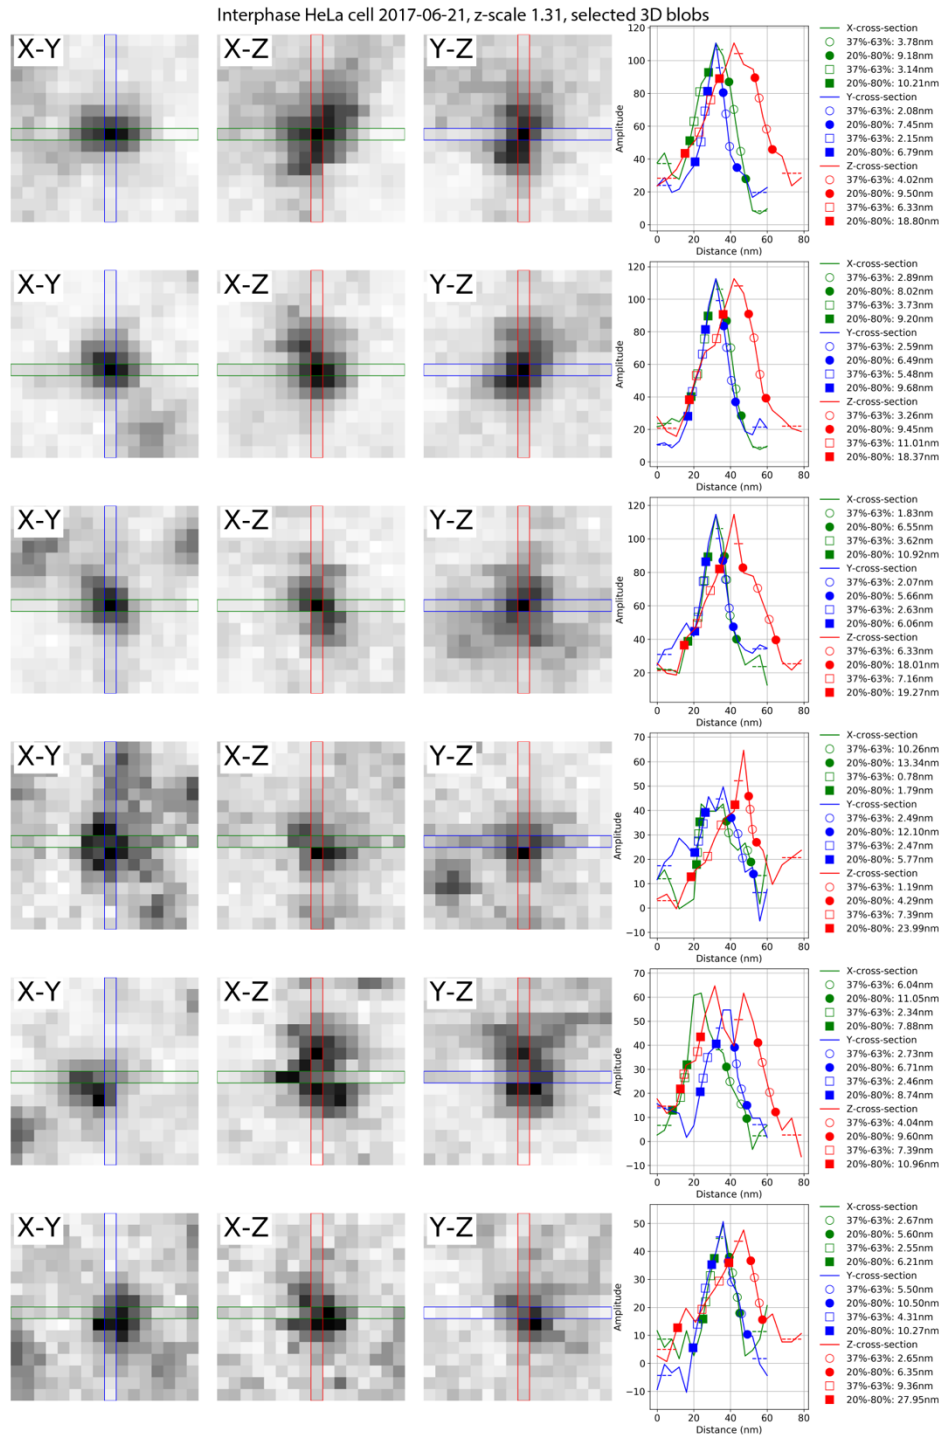

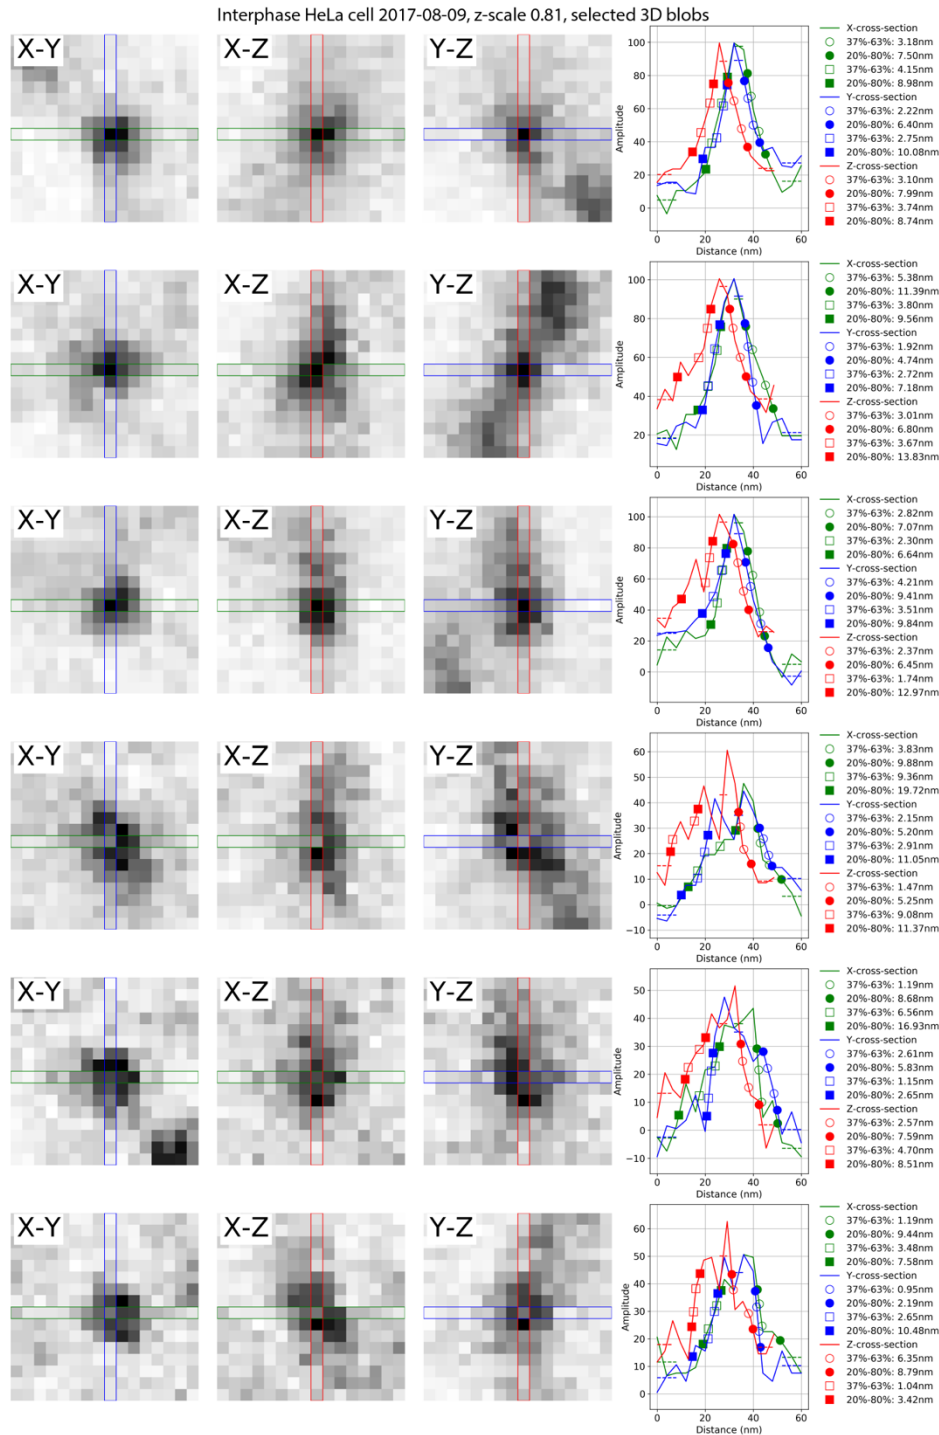

554

555 Extended Data Fig. 5 Cross-sections of the example of ribosomes from the dataset Interphase

556 HeLa Cell 2017-08-09 and the profiles with the transition analysis. The top three rows are the

557 brightest ribosomes and the bottom three rows are the dimmest ribosomes.

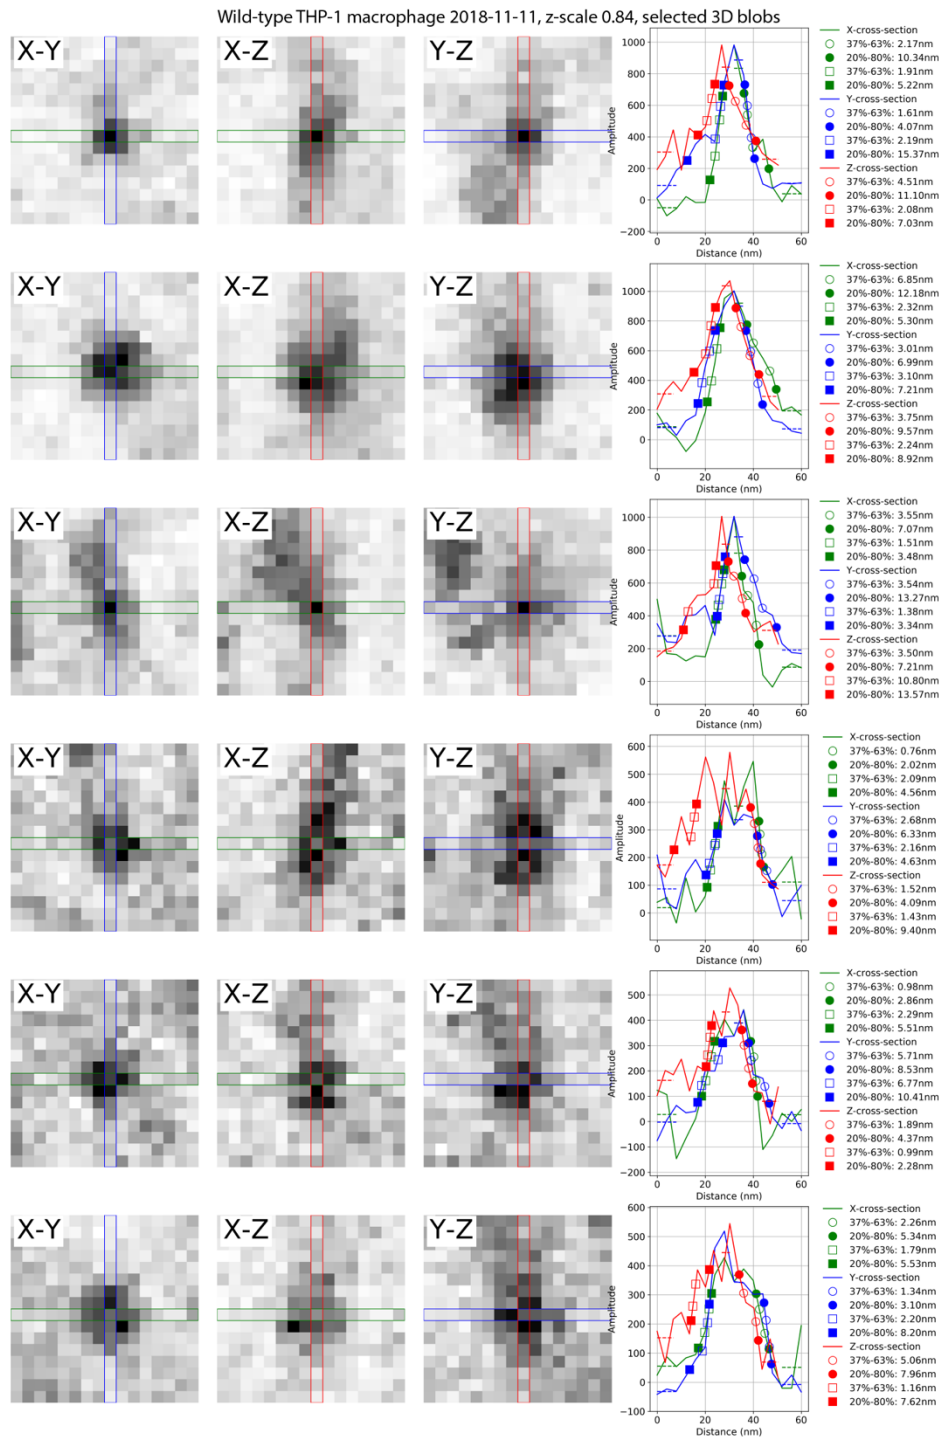

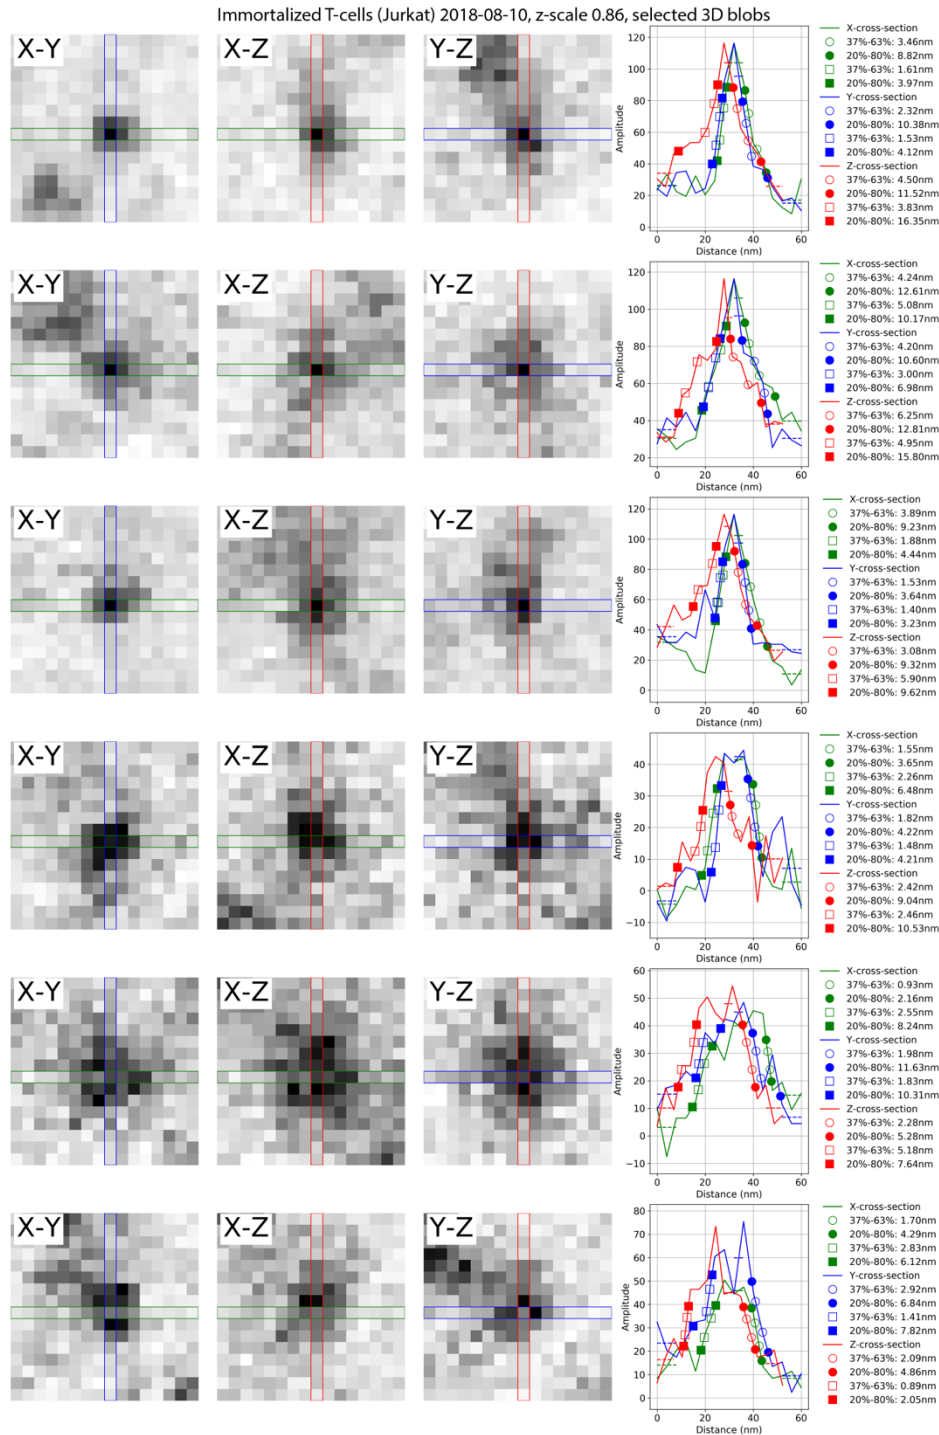

562

563 Extended Data Fig. 7 Cross-sections of the example of ribosomes from the dataset

564 Immortalized T-cells (Jurkat) 2018-08-10 and the profiles with the transition analysis. The top

565 three rows are the brightest ribosomes and the bottom three rows are the dimmest ribosomes.

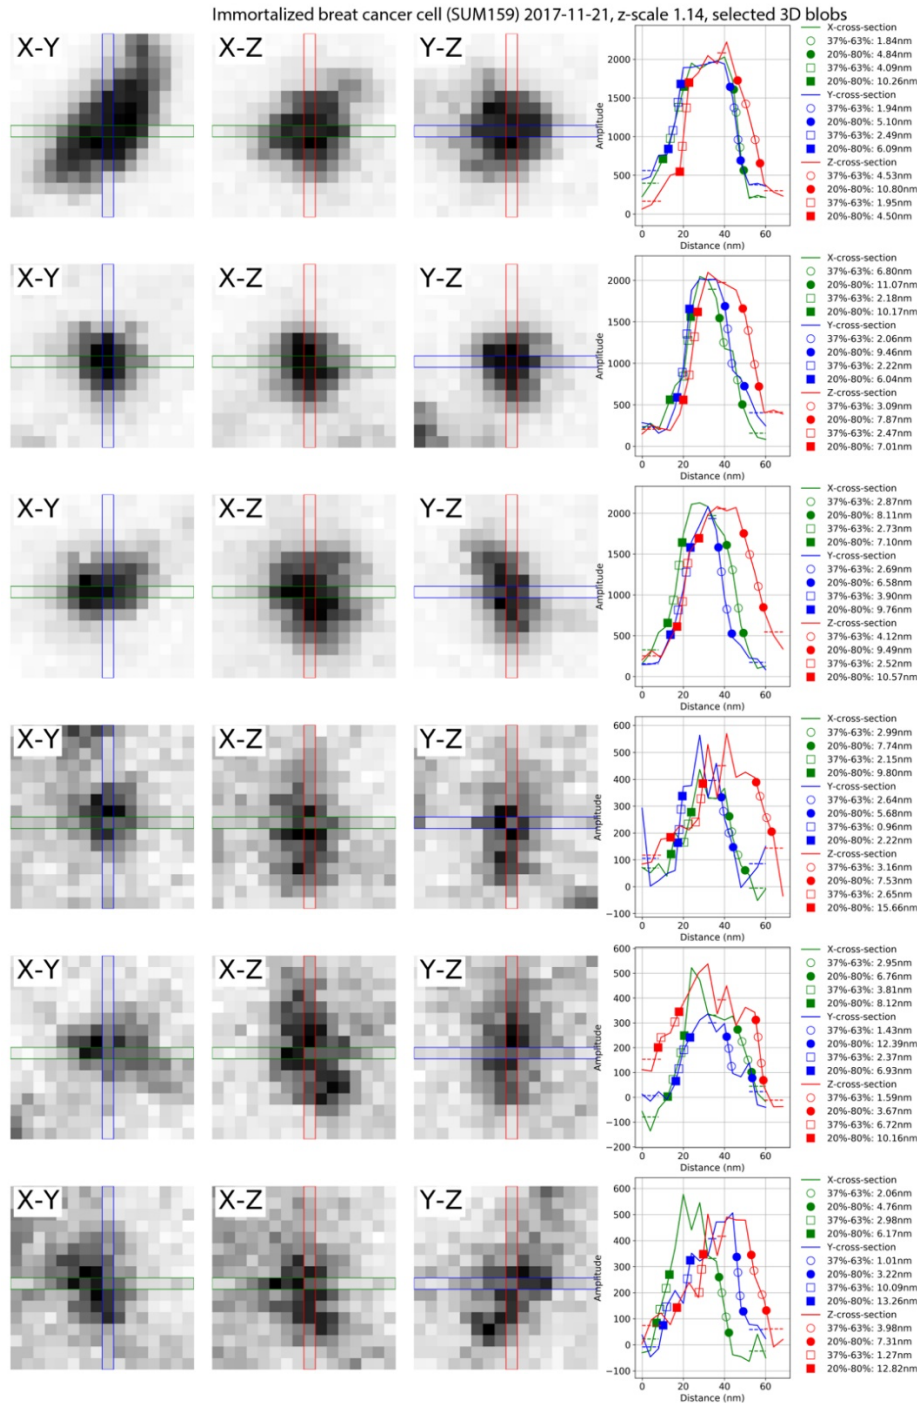

566

567 Extended Data Fig. 8 Cross-sections of the example of ribosomes from the dataset

568 Immortalized breast cancer cell (SUM159) 2017-11-21 and the profiles with the transition

569 analysis. The top three rows are the brightest ribosomes and the bottom three rows are the

570 dimmest ribosomes.



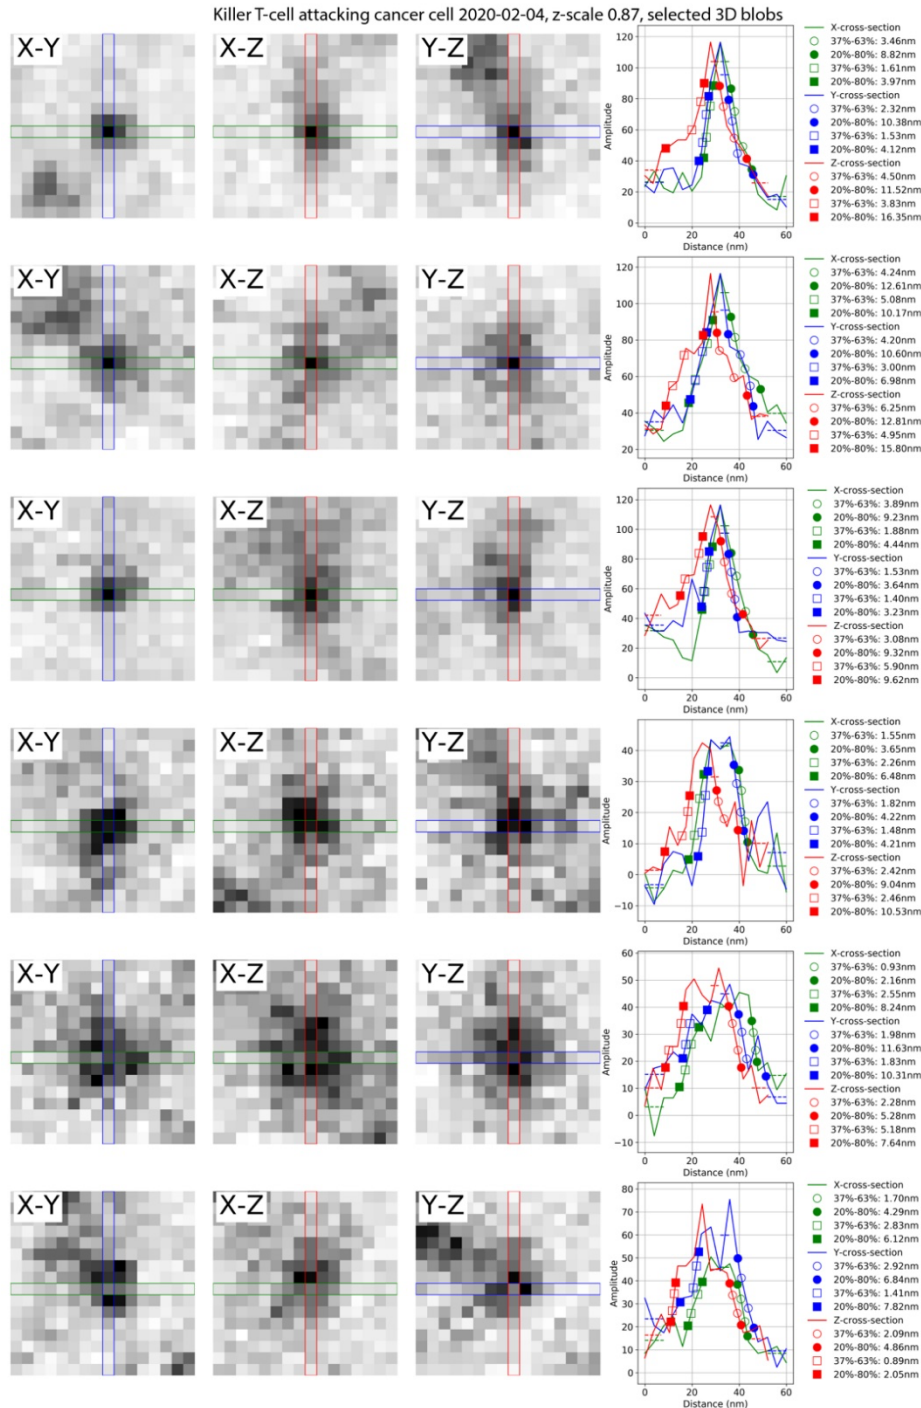

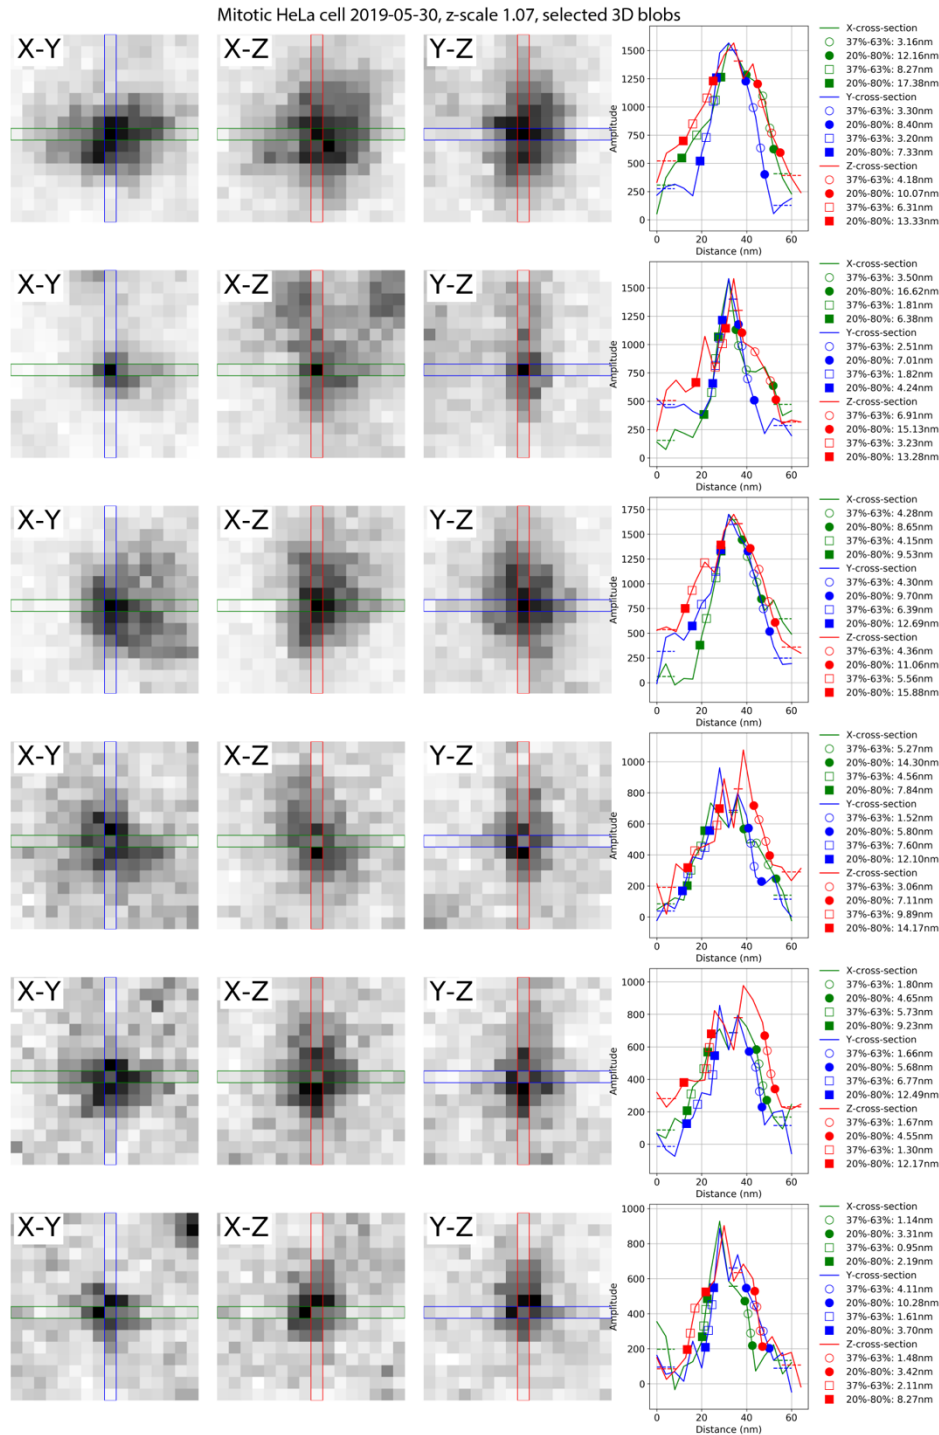

580

581 **Tables**

582 **Table 1. Descriptions of exemplary datasets with selected imaging conditions**

| Sample Description                                                                | Protocol                                                                                                                                                                      | Landing Energy (kV) | Imaging Current (nA) | Scan Speed (MHz) | Acquisition Duration (days) | Data Volume: X * Y * Z ( $\mu\text{m}^3$ ) | Z-scaling factor |
|-----------------------------------------------------------------------------------|-------------------------------------------------------------------------------------------------------------------------------------------------------------------------------|---------------------|----------------------|------------------|-----------------------------|--------------------------------------------|------------------|
| Cell 4 nm                                                                         |                                                                                                                                                                               |                     |                      |                  |                             |                                            |                  |
| Interphase HeLa cell<br>2017-06-21                                                | High pressure freezing, freeze-substitution with 2% OsO4 0.1% UA 3% H2O in Acetone, resin embedding in Eponate 12                                                             | 0.9                 | 0.24                 | 0.1              | 25                          | 48 * 6 * 25<br>(7800)                      | 1.31             |
| Interphase HeLa cell<br>2017-08-09†                                               |                                                                                                                                                                               | 1.0                 | 0.24                 | 0.2              | 31                          | 50 * 4 * 48<br>(9600)                      | 0.81             |
| Mitotic HeLa cell<br>2019-05-30                                                   |                                                                                                                                                                               | 0.9                 | 0.24                 | 0.2              | 15                          | 30 * 14 * 33<br>(13300)                    | 1.07             |
| Wild-type THP-1 macrophage<br>2018-11-11                                          |                                                                                                                                                                               | 1.2                 | 0.24                 | 0.2              | 20                          | 40 * 8 * 44<br>(14200)                     | 0.84             |
| Immortalized T-cells (Jurkat)<br>2018-08-10                                       |                                                                                                                                                                               | 1.0                 | 0.24                 | 0.2              | 19                          | 40 * 12 * 34<br>(16400)                    | 0.86             |
| Immortalized breast cancer cell (SUM159) 2017-11-21‡                              |                                                                                                                                                                               | 1.2                 | 0.24                 | 0.2              | 19                          | 64 * 11 * 31<br>(21900)                    | 1.14             |
| Killer T-Cell attacking cancer cell<br>2020-02-04†                                |                                                                                                                                                                               | 0.7                 | 0.25                 | 0.2              | 29                          | 74 * 13 * 48<br>(45500)                    | 0.87             |
| Tissue 4 nm                                                                       |                                                                                                                                                                               |                     |                      |                  |                             |                                            |                  |
| Isolated murine pancreatic islets<br>2019-03-01†                                  | HPF, FS with 2%OsO4, 1% UA, 0.5% GA, 5% H2O in Acetone with 1% Methanol followed by 0.2% TCH in 80% Methanol at RT, 2% OsO4 in Acetone at RT, 1% UA in Acetone + 10% Methanol | 0.9                 | 0.14                 | 0.2              | 15                          | 30 * 20 * 29<br>(17400)                    | 0.85             |
| <i>Drosophila</i> brain: Fan-shaped body of a 5-day-old male adult<br>2019-09-14† | Chemical Fixation, ORTO-Lead-EPTA staining via Progressive Lowering of Temperature and                                                                                        | 0.7                 | 0.24                 | 1.5              | 15                          | 45 * 56 * 45<br>(113400)                   | 1                |
| <i>Drosophila</i> brain: Accessory calyx of a 5-day-old male adult<br>2019-12-06  | Low Temperature Staining (PLT-LTS) heavy metal enhancement protocol                                                                                                           | 0.7                 | 0.3                  | 2                | 19                          | 50 * 40 * 87<br>(175000)                   | 0.93             |

583

584 † Figures in main text.

585 ‡ Treated with 0.5 mM oleic acid for 45 mins prior to high pressure freezing to induce the formation of lipid

586 droplets.

587 Extended Data Table 1. Z scaling factors estimated using SEM working distance and FIB milling  
 588 voltage.

| DataSet                                                | Z (milling direction) pixel scaling factor |                          |               |
|--------------------------------------------------------|--------------------------------------------|--------------------------|---------------|
|                                                        | SEM Working Distance (WD)                  | FIB milling voltage (MV) | Mean (WD, MV) |
| Interphase HeLa cell 2017-06-21                        | 1.22                                       | 1.40                     | 1.31          |
| Interphase HeLa cell 2017-08-09                        | 0.80                                       | 0.83                     | 0.81          |
| Mitotic HeLa cell 2019-05-30                           | 1.07                                       | 1.07                     | 1.07          |
| Wild-type THP-1 macrophage 2018-11-11                  | 0.81                                       | 0.87                     | 0.84          |
| Immortalized T-cells (Jurkat) 2018-08-10               | 0.84                                       | 0.88                     | 0.86          |
| Immortalized breast cancer cell (SUM159)<br>2017-11-21 | 1.13                                       | 1.14                     | 1.14          |
| Killer T-Cell attacking cancer cell 2020-02-04         | 0.88                                       | 0.87                     | 0.87          |
|                                                        |                                            |                          |               |
| Isolated murine pancreatic islets 2019-03-01           | 0.86                                       | 0.84                     | 0.85          |
| <i>Drosophila</i> Fan-shaped body 2019-09-14           | 0.98                                       | 1.03                     | 1.00          |
| <i>Drosophila</i> Accessory calyx 2019-12-06           | 0.95                                       | 0.92                     | 0.93          |

589

## 590 References

- 
- <sup>19</sup> Sartori, N., Richter, K., & Dubochet, J. Vitrification depth can be increased more than 10-fold by high-pressure freezing. *J. Microsc.* **172**(1), 55–61 (1993). <https://doi.org/10.1111/j.1365-2818.1993.tb03393.x>
- <sup>20</sup> Gotoh, M., Maki T., Kiyozumi, T., Satomi, S., & Monaco, A. P. An improved method for isolation of mouse pancreatic islets. *Transplantation* **40**, 437–438 (1985). <https://doi.org/10.1097/00007890-198510000-00018>
- <sup>21</sup> Müller, A. et al. A global approach for quantitative super resolution and electron microscopy on cryo and epoxy sections using self-labeling protein tags. *Sci. Rep.* **7**, 23 (2017). <https://doi.org/10.1038/s41598-017-00033-x>
- <sup>22</sup> Kremer, J. R., Mastronarde, D. N., & McIntosh, J. R., Computer visualization of three-dimensional image data using IMOD. *J. Struct. Biol.* **116**, 71–76 (1996). <https://doi.org/10.1006/jsbi.1996.0013>
- <sup>23</sup> Lu, Z. et al. En bloc preparation of *Drosophila* brains enables high-throughput FIB-SEM connectomics. *bioRxiv*: 855130 (2019). <https://doi.org/10.1101/855130>
- <sup>24</sup> Saalfeld, S., Cardona, A., Hartenstein, V. & Tomančák, P. As-rigid-as-possible mosaicking and serial section registration of large ssTEM datasets. *Bioinformatics* **26**, i57–63 (2010). <https://doi.org/10.1093/bioinformatics/btq219>
- <sup>25</sup> van der Walt, S. et al. scikit-image: image processing in Python. *PeerJ.* **2**:e453 (2014). <https://doi.org/10.7717/peerj.453>
